# Supplementary material for: Nitrogen adsorption via charge transfer on vacancies created during surfactant assisted exfoliation of TiB2
Source: Royal Society of Chemistry journal article supplement (doi:10.1039/d2nr06676a), 2023-01-01
Supplement: d2nr06676a1.pdf [file d2nr06676a1.pdf]

## Nitrogen adsorption *via* charge transfer on vacancies created during surfactant assisted exfoliation of $\text{TiB}_2$

Anshul Rasyotra<sup>a</sup>, Anupma Thakur<sup>a</sup>, Raviraj Mandalia<sup>b</sup>, Raghavan Ranganathan<sup>b</sup> and Kabeer Jasuja<sup>a\*</sup>

<sup>a</sup> *Discipline of Chemical Engineering, Indian Institute of Technology Gandhinagar, Palaj, Gandhinagar, Gujarat 382055, India*

<sup>b</sup> *Discipline of Materials Engineering, Indian Institute of Technology Gandhinagar, Palaj, Gandhinagar, Gujarat 382055, India*

Corresponding Author: kabeer@iitgn.ac.in

### *Electronic Supplementary Information (ESI)*

#### A. Crystal Structure of Titanium Diboride ( $\text{TiB}_2$ )

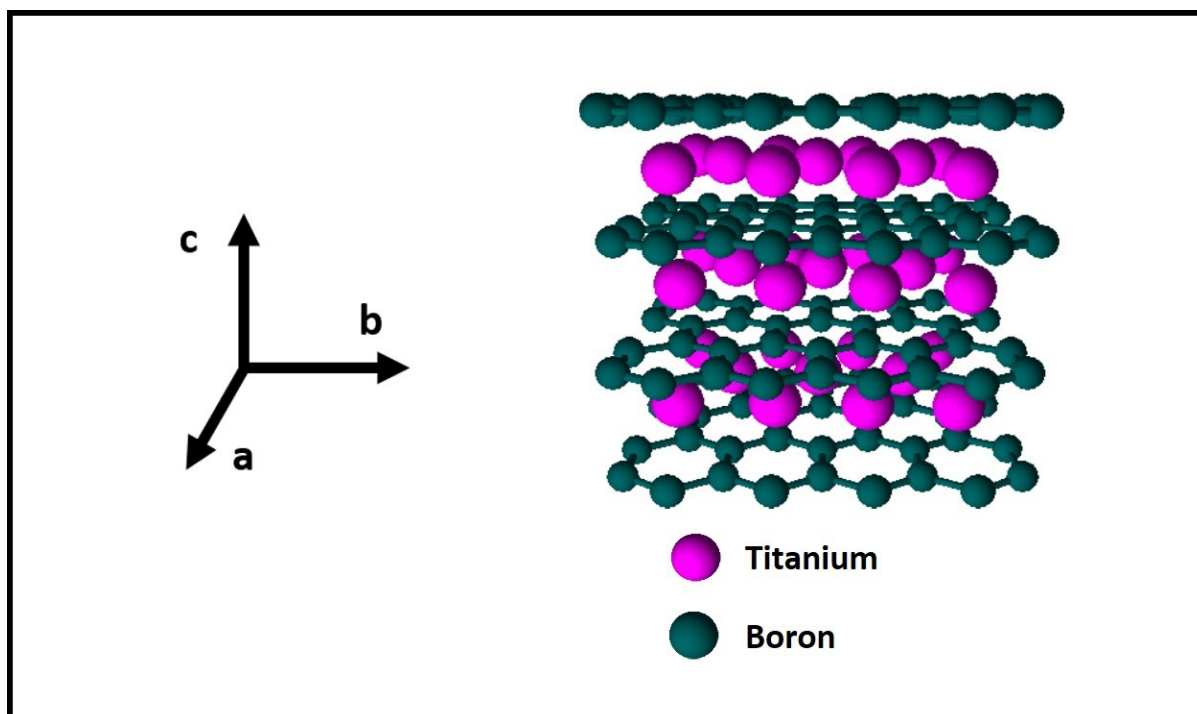

*Figure S1: Crystal structure of  $\text{TiB}_2$  – pink-colored atoms represent titanium, and green-colored atoms represent boron.*

TiB<sub>2</sub> is a well-known ceramic material with high mechanical strength and wear resistance. It has a hexagonal C32 structure with P6/mmm space group. TiB<sub>2</sub> has primarily been used as a coating for aluminium electrolysis cell, as a cutting tool, or as a conductive ceramic material. However, nano scaling this metal diboride opens up various avenues when the chemistry of boron and transition metal atoms could be used for various energy applications.

**Table S 1:** Lattice parameters of TiB<sub>2</sub>

| Lattice parameters | Atomic distance (Å) |
|--------------------|---------------------|
| <b>a</b>           | 3.03                |
| <b>b</b>           | 3.03                |
| <b>c</b>           | 3.23                |

## B. Pre-Treatment of Bulk TiB<sub>2</sub> Powder

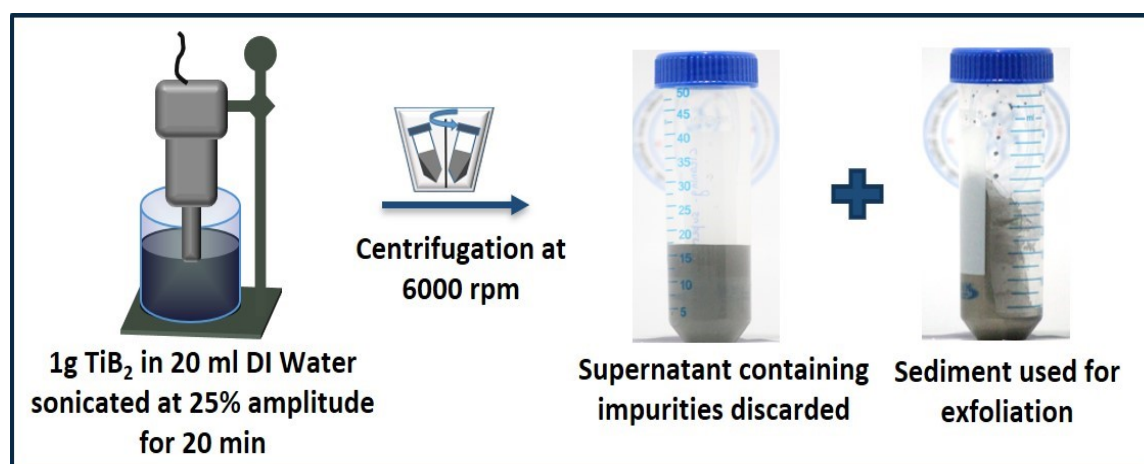

**Figure S 2:** Procedure for cleaning of bulk TiB<sub>2</sub> powder

1 gm of TiB<sub>2</sub> bulk powder (Sigma Aldrich, 99% pure, size < 10 μm) was added to 20 mL of deionized water (Millipore Ultrapure Type - II, ionic conductivity = 18.2 MΩ·cm (25°C)) at a concentration of 50 mg/mL. The mixture was probe sonicated for 20 minutes at 25% amplitude using QSonica 500 probe sonicator. This step was performed to remove any impurities in the as-obtained powder.

### C. Tyndall Effect

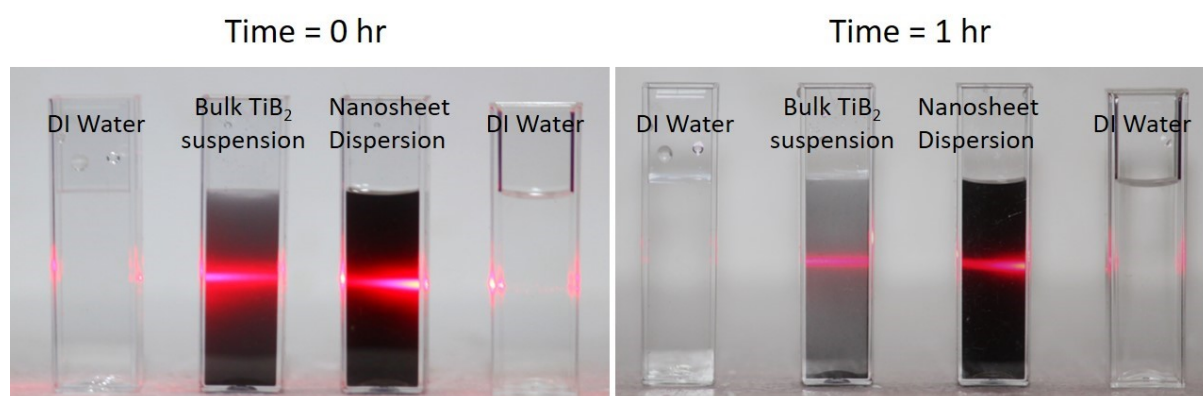

**Figure S 3:** Tyndall effect test to check the colloidal nature of the dispersion.

At  $t = 0$  hr, both bulk  $\text{TiB}_2$  suspension and  $\text{TiB}_2$  nanosheet dispersion having different color shows Tyndall effect. After 1 hr, much of the bulk  $\text{TiB}_2$  powder settles at the bottom which is apparent from the color of the solution. However, no color change in  $\text{TiB}_2$  nanosheet dispersion indicates better stability compared with bulk  $\text{TiB}_2$  suspended in DI water. The appearance of beam in bulk  $\text{TiB}_2$  suspension is possibly due to the impurities in the bulk powder which are cleaned during the pre-treatment step as explained in Figure S2.

### D. Surfactant removal and Recovery of powder form of nanosheets

In this process, nanosheets were centrifuged at 14500 RPM for 10 min. The supernatant was discarded and the sediment was redispersed in 20 mL of DI water. This dispersion was

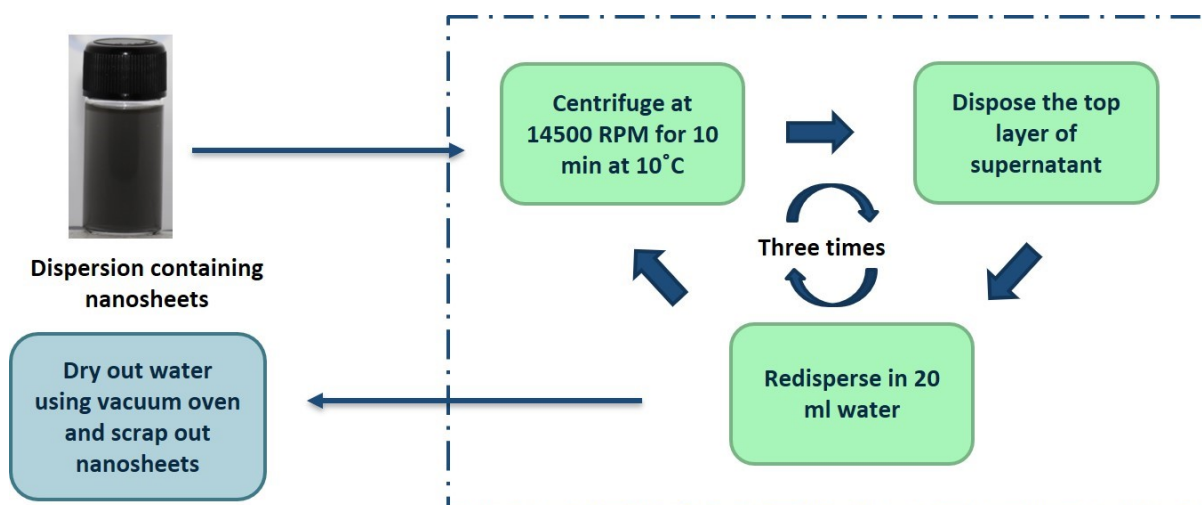

**Figure S 4:** Recovery of nanosheets in powder form

centrifuged at 14500 RPM to settle out the nanosheets. This procedure was repeated three times to remove the surfactant from the nanosheets. The final sediment was then kept for drying in a vacuum oven for 2 hours at 60°C.

### **E. Choice of the centrifugation rate**

A 100 ml dispersion of TiB<sub>2</sub> nanosheets was prepared and divided into four parts of 25 mL each. This dispersion was subjected to different centrifugation rates – 1000 RPM, 1500 RPM, 2000 RPM, and 3000 RPM for 45 minutes. ~ 15 mL supernatant from each dispersion was collected and drop cast on the lacey carbon Cu grid (300 mesh) for TEM analysis. TEM images for all four dispersions are shown below. The centrifugation rate of 1500 RPM was chosen because the dispersion obtained after centrifugation at 1000 RPM contained some unexfoliated crystallites. The centrifugation rate of 1500 RPM removed all the unexfoliated crystallites in the dispersion. The higher centrifugation rate would have resulted in the loss of nanosheets with large lateral sizes.

#### **1000 RPM**

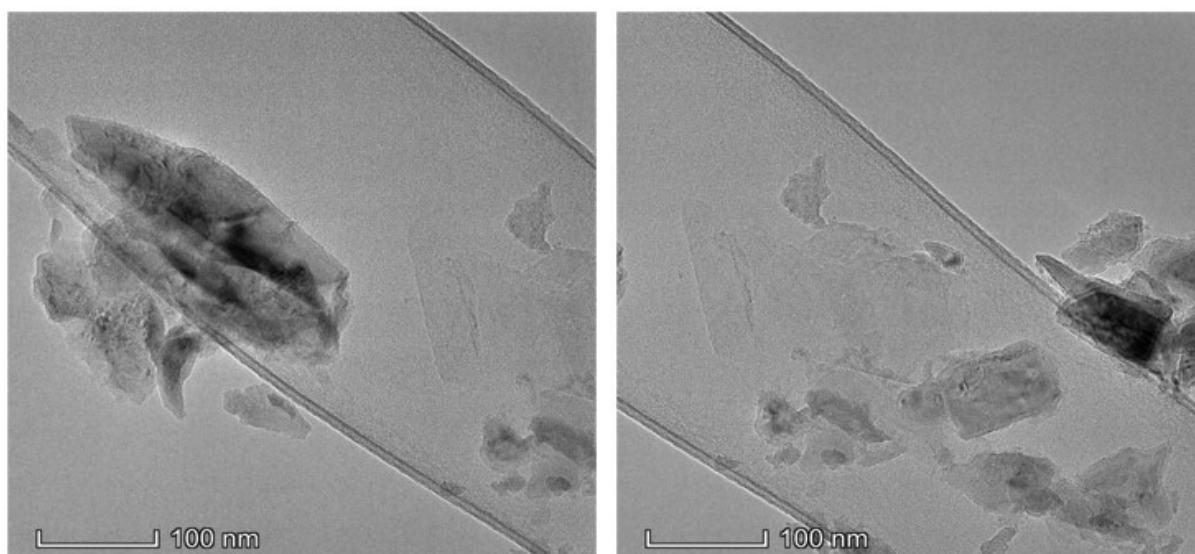

**Figure S 5:** TEM images of nanosheets obtained after centrifuging the dispersion at 1000 RPM

## 1500 RPM

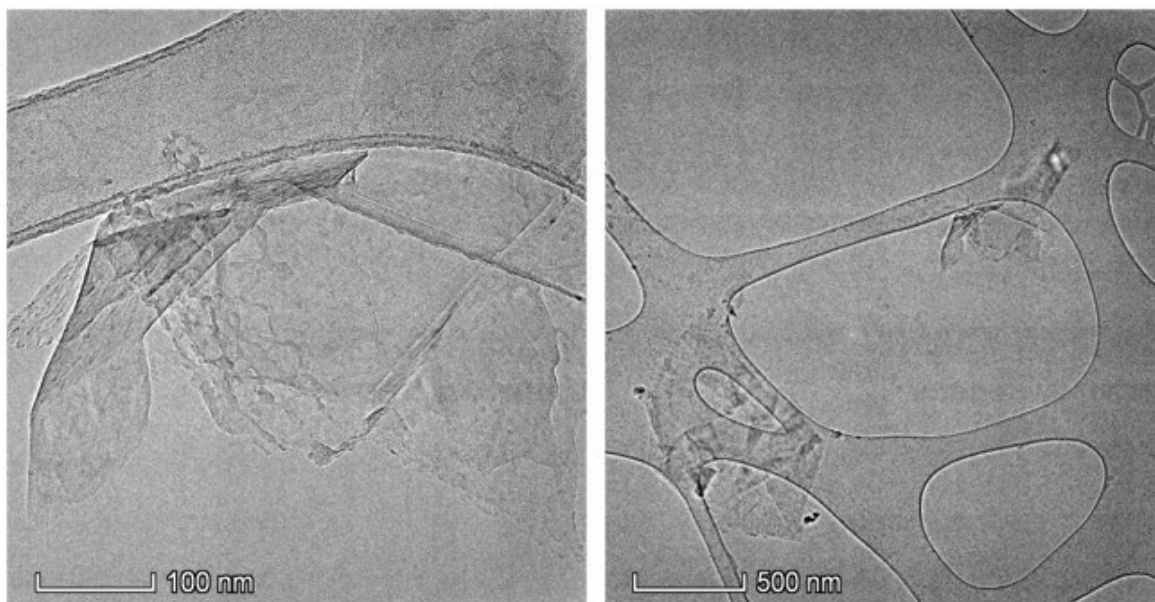

*Figure S 6: TEM images of nanosheets obtained after centrifuging the dispersion at 1500 RPM*

## 2000 RPM

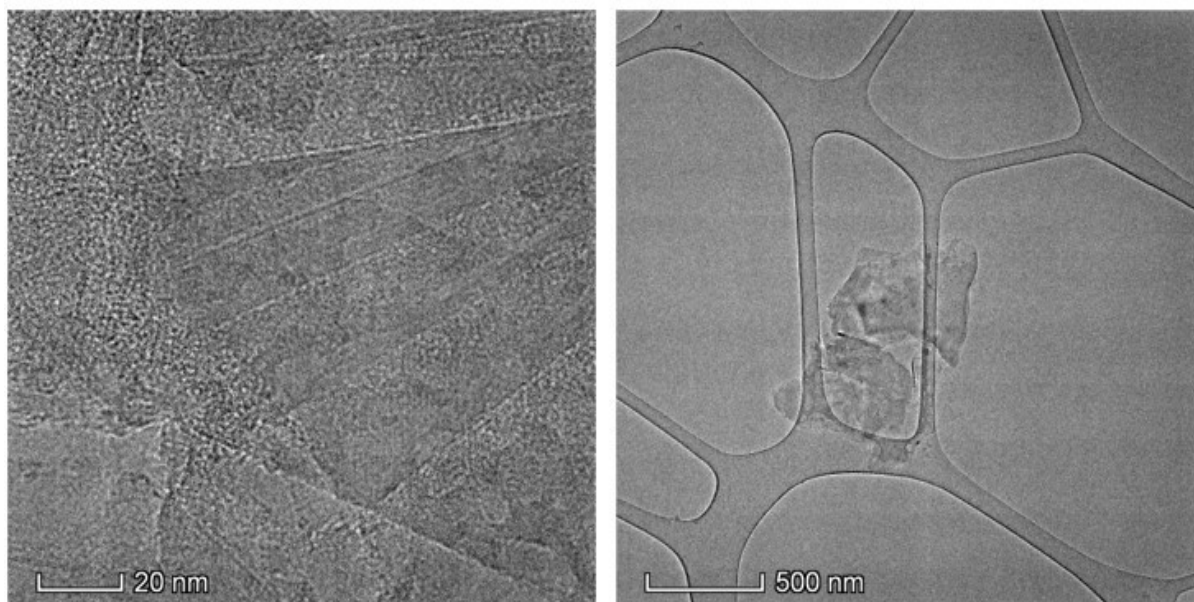

*Figure S 7: TEM images of nanosheets obtained after centrifuging the dispersion at 2000 RPM*

**3000 RPM**

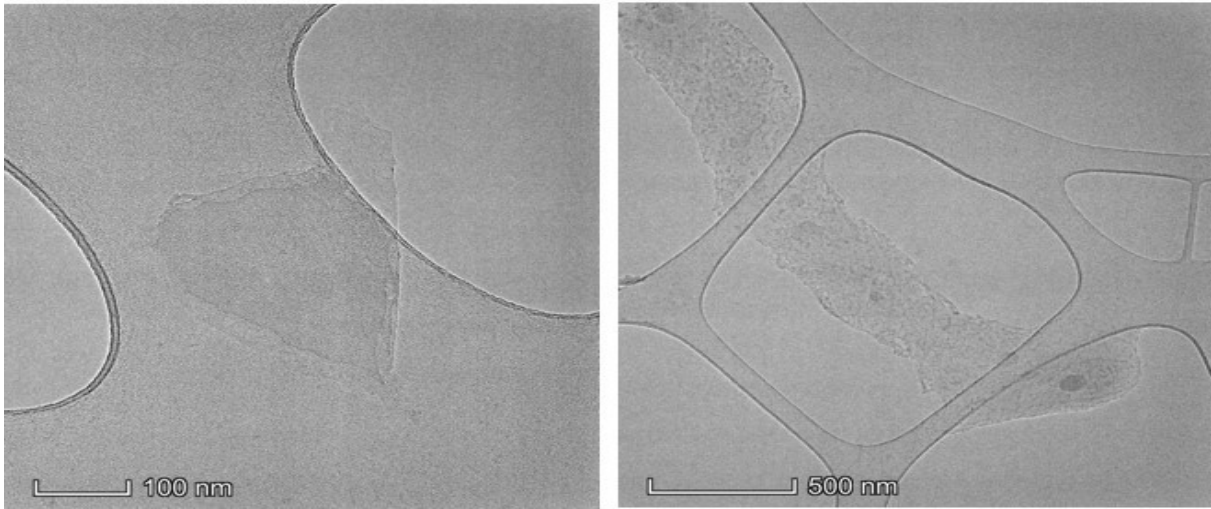

**Figure S 8:** TEM images of nanosheets obtained after centrifuging the dispersion at 3000 RPM

**F. TEM Library:**

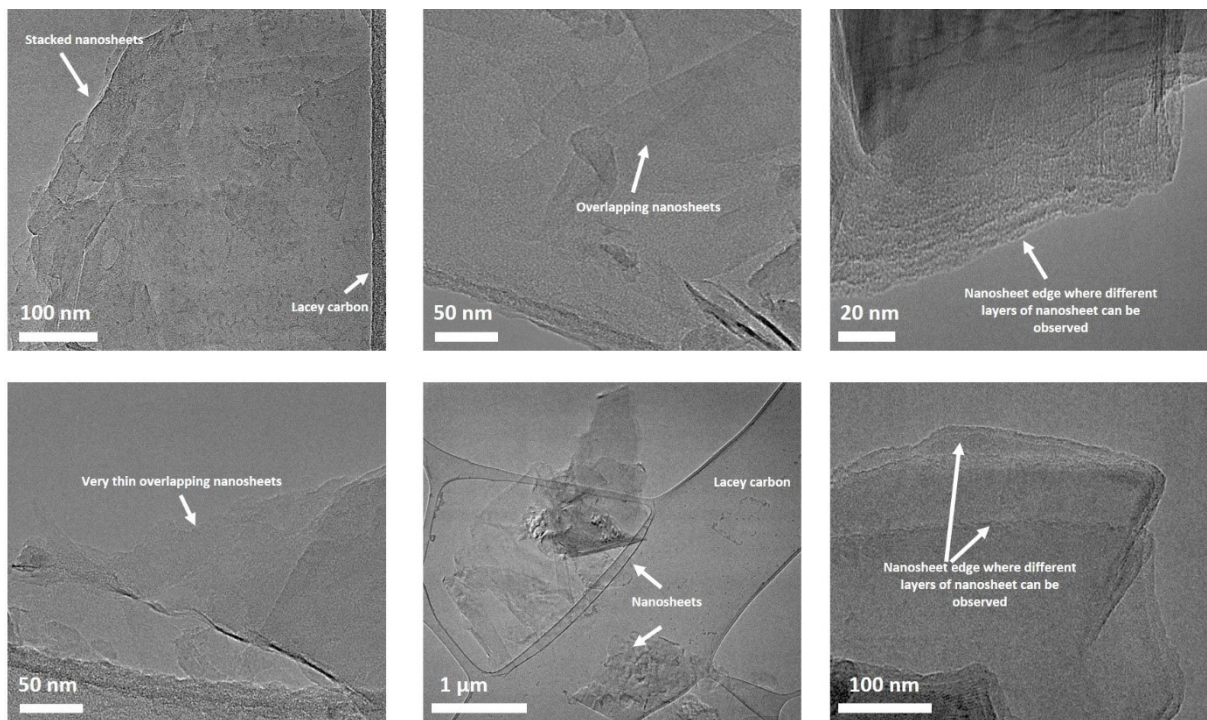

**Figure S 9:** TEM images of nanosheets obtained from  $r = 0.2$

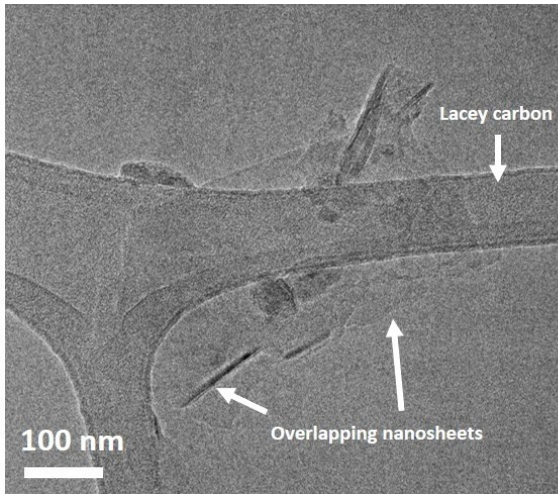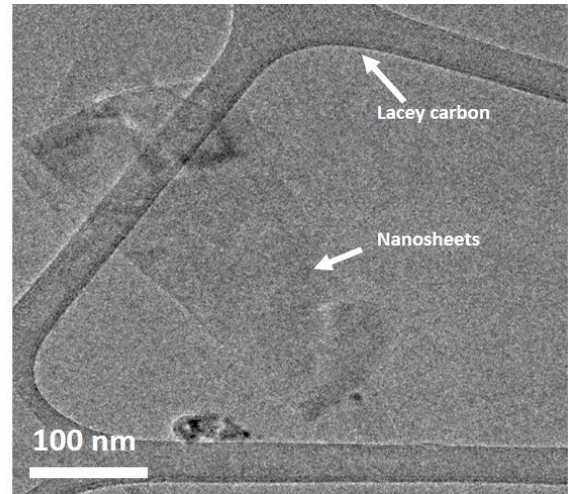

**Figure S 10:** TEM images of nanosheets obtained from  $r = 0.1$

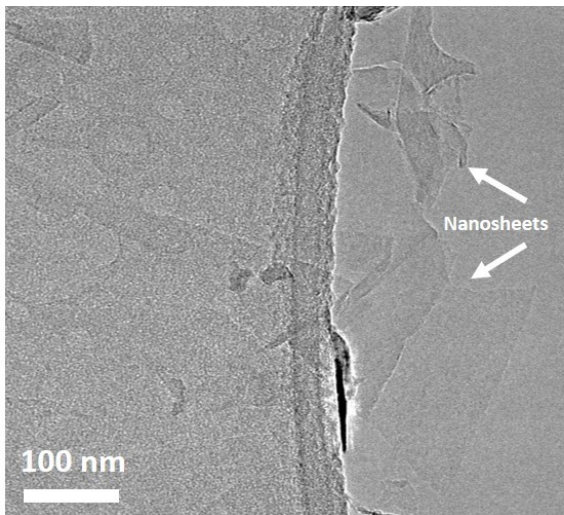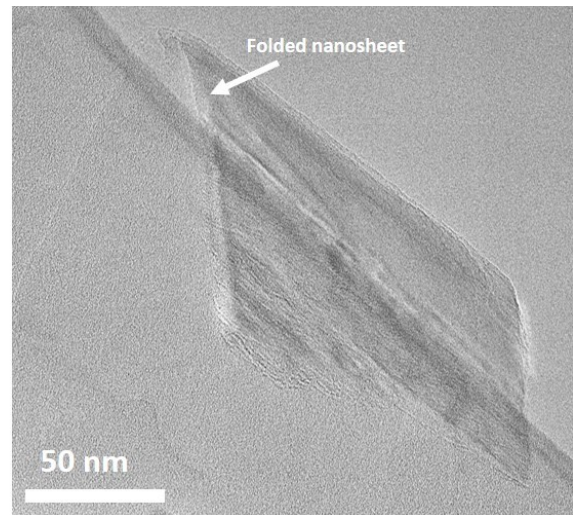

**Figure S 11:** TEM images of nanosheets obtained from  $r = 0.15$

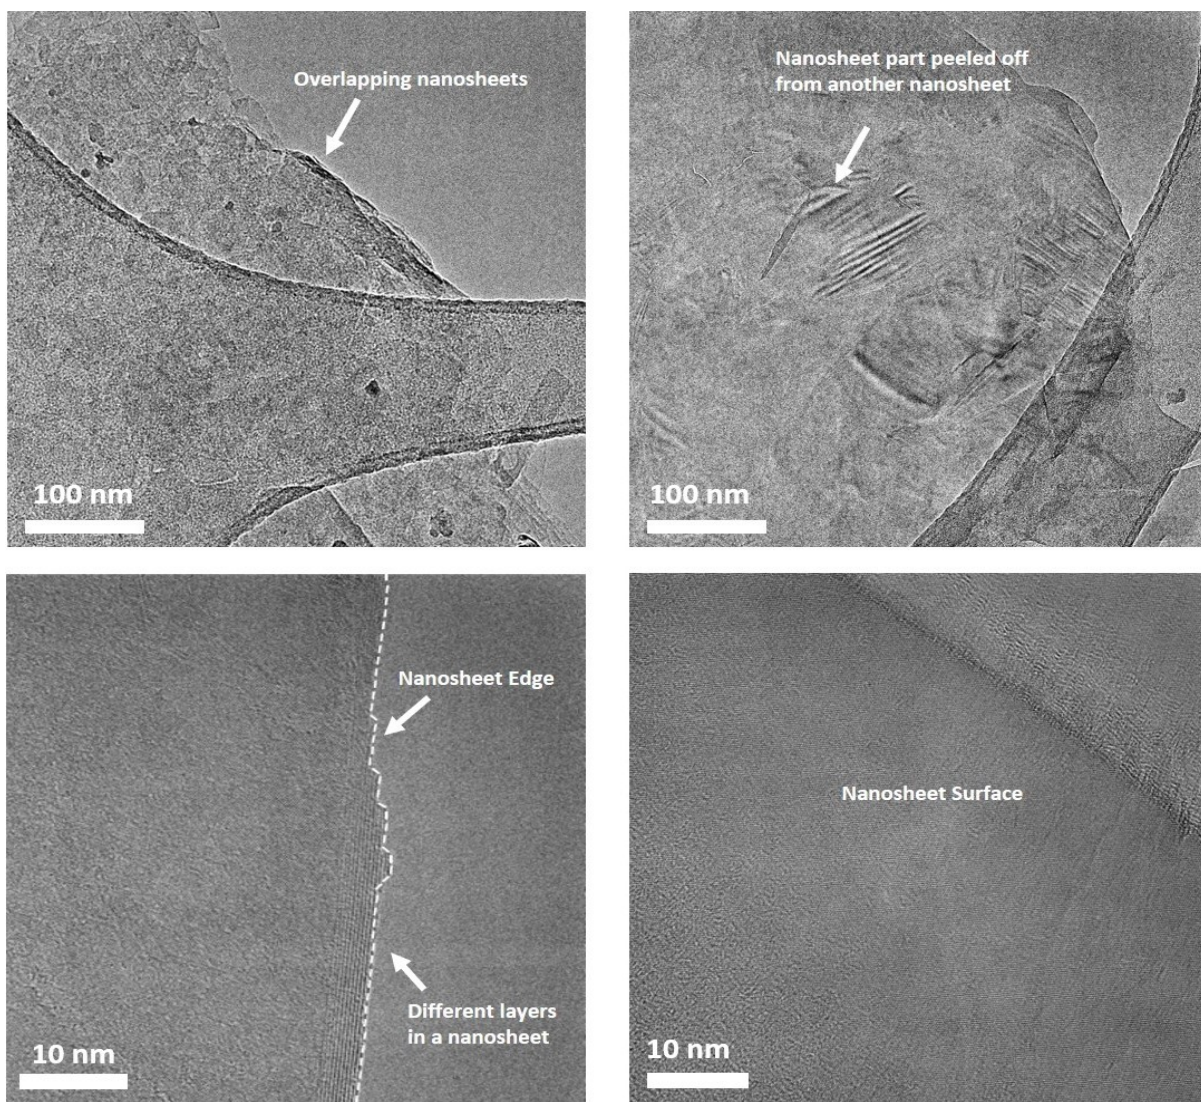

**Figure S 12:** TEM images of nanosheets obtained from  $r = 0.3$

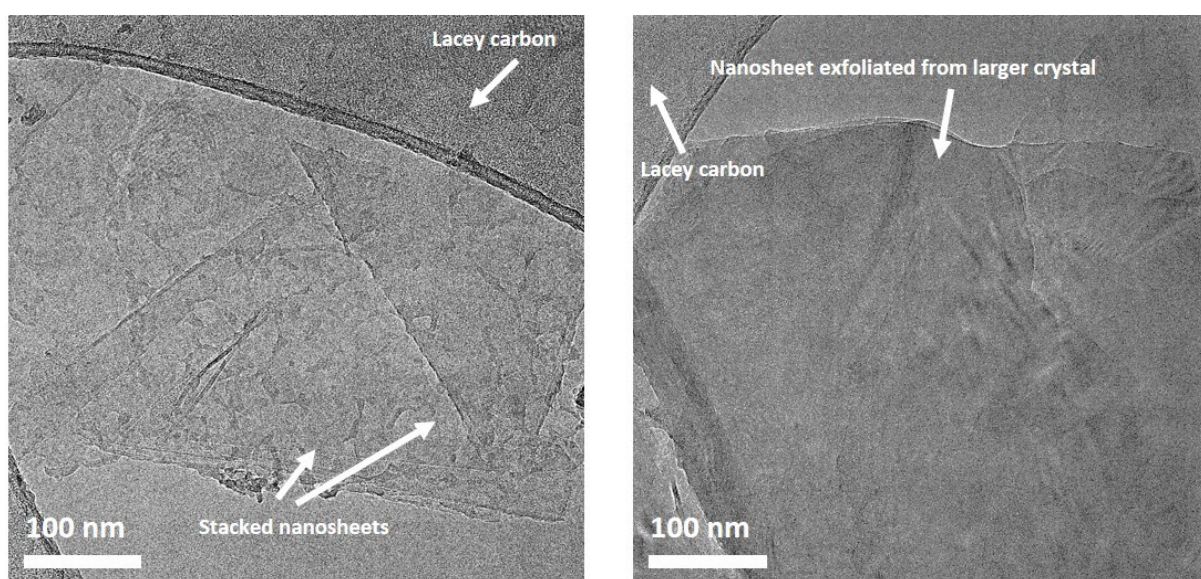

**Figure S 13:** TEM images of nanosheets obtained from  $r = 0.4$



*Figure S 14: Different patterns observed due to overlapping nanosheets*

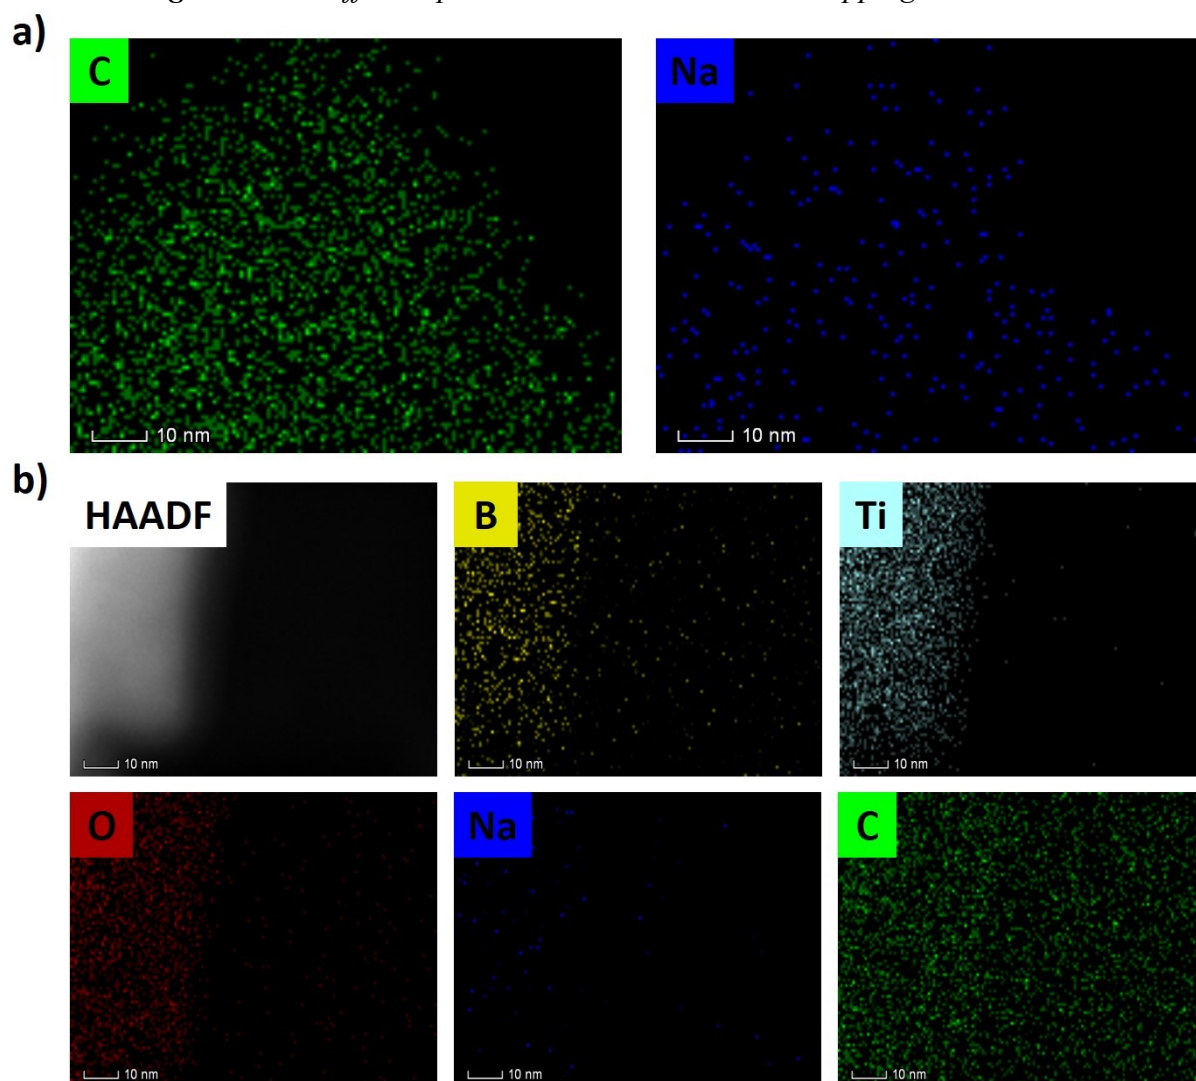

*Figure S 15: TEM-EDS mapping of nanosheets. (a) Carbon and sodium signal captured from the nanosheet in Figure 2(e) in the main manuscript. (b) EDS mapping of a different nanosheet.*

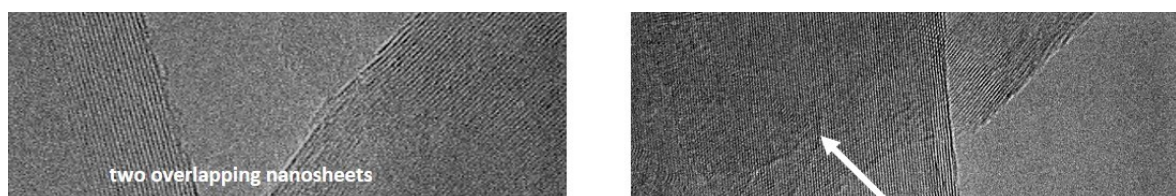

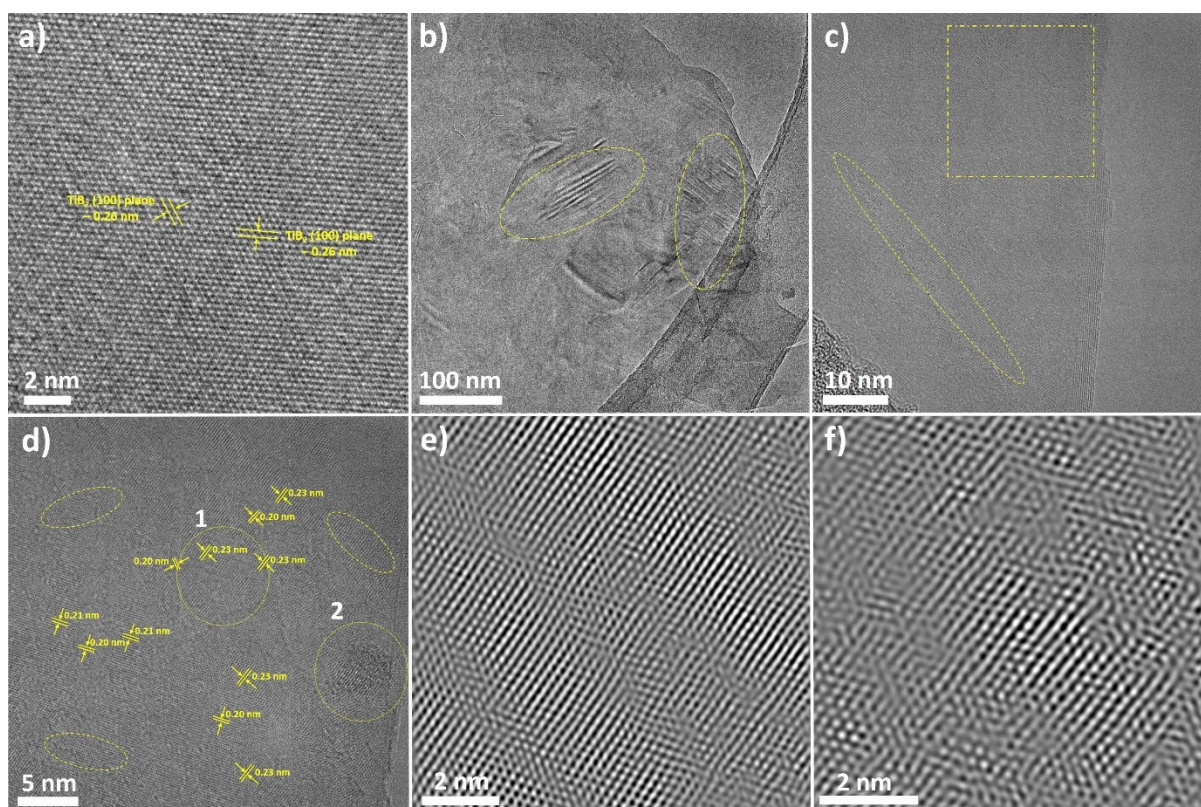

**Figure S 16:** (a) HRTEM image of the selected area from Figure 2g having no defects and d-spacing of 0.20 nm corresponding to (101) plane of  $\text{TiB}_2$ . (b) TEM image of a nanosheet where defects are clearly visible indicated using yellow eclipse. (c) HRTEM image of a different nanosheet shows a line defect (indicated using yellow eclipse) present on the plane along with multiple small defects. (d) HRTEM image of marked area of Figure 1c showing various defects. (e,f) Inverse FFT image of marked area 1 and 2 in Figure 1d showing defect-rich regions.

Figure S16a represents a magnified version of Figure 2h from the main manuscript where d-spacing of 0.26 nm was obtained directly and matches with (101) plane of  $\text{TiB}_2$ . Figure S16b presents an HRTEM image of a different nanosheet where the defects are clearly visible. Figure S16c presents a third nanosheet where a line defect is clearly visible with multiple small defects. Figure S16d is a magnified version of Figure S16c where different defects have been marked using yellow eclipse. We also compared the d-spacings from defect-free regions and regions where defects were observed within in the same nanosheet. A d-spacing of 0.20 nm was obtained from defect-free region which corresponds to (100) plane of  $\text{TiB}_2$ . Similarly, d-spacings of 0.22 nm and 0.23 nm were obtained from regions where defects were clearly visible. This increase in interlayer spacing is possibly due to the incorporation of oxygen or nitrogen functional groups in the  $\text{TiB}_2$  lattice.<sup>1</sup> We further generated an inverse FFT image

from circular region 1 and 2 in Figure S16d to clearly view the defects which is presented as Figure S16e, f. The inverse FFT image clearly shows the presence of defects over the nanosheet area. Zhang *et al.* inferred a similar increase in the interlayer spacing of regions having defects in MoS<sub>2</sub> nanosheets.<sup>2</sup>

### ***G. Identifying (hkl) plane from SAED pattern image:***

To identify the (hkl) planes, ImageJ software was used. The scale bar in the SAED image was used to calibrate the lengths in the software. The distances between various spots were noted down by plotting circles over various planes in the image and noting down their diameters represented by  $1/2r$  or  $1/d$ . Here, “d” refers to the interplanar distance. Further calculations have been shown below in the table. (hkl) values were taken from ICDD database corresponding to the d-spacing values.

**Table S 2:** Calculations for determining (hkl) planes in SAED image

| <b>S. No.</b> | <b><math>1/2r</math> or <math>1/d</math><br/>(<math>\text{nm}^{-1}</math>)</b> | <b><math>1/r</math> (<math>\text{nm}^{-1}</math>)</b> | <b>r (nm)</b> | <b>d (Å)</b> | <b>(hkl)</b> |
|---------------|--------------------------------------------------------------------------------|-------------------------------------------------------|---------------|--------------|--------------|
| 1             | 12.42                                                                          | 6.21                                                  | 0.161         | 1.61         | (002)        |
| 2             | 9.85                                                                           | 4.925                                                 | 0.203         | 2.03         | (101)        |
| 3             | 7.81                                                                           | 3.905                                                 | 0.256         | 2.56         | (100)        |
| 4             | 6.32                                                                           | 3.16                                                  | 0.316         | 3.16         | (001)        |

## H. Histogram for determining the average thickness of the nanosheets

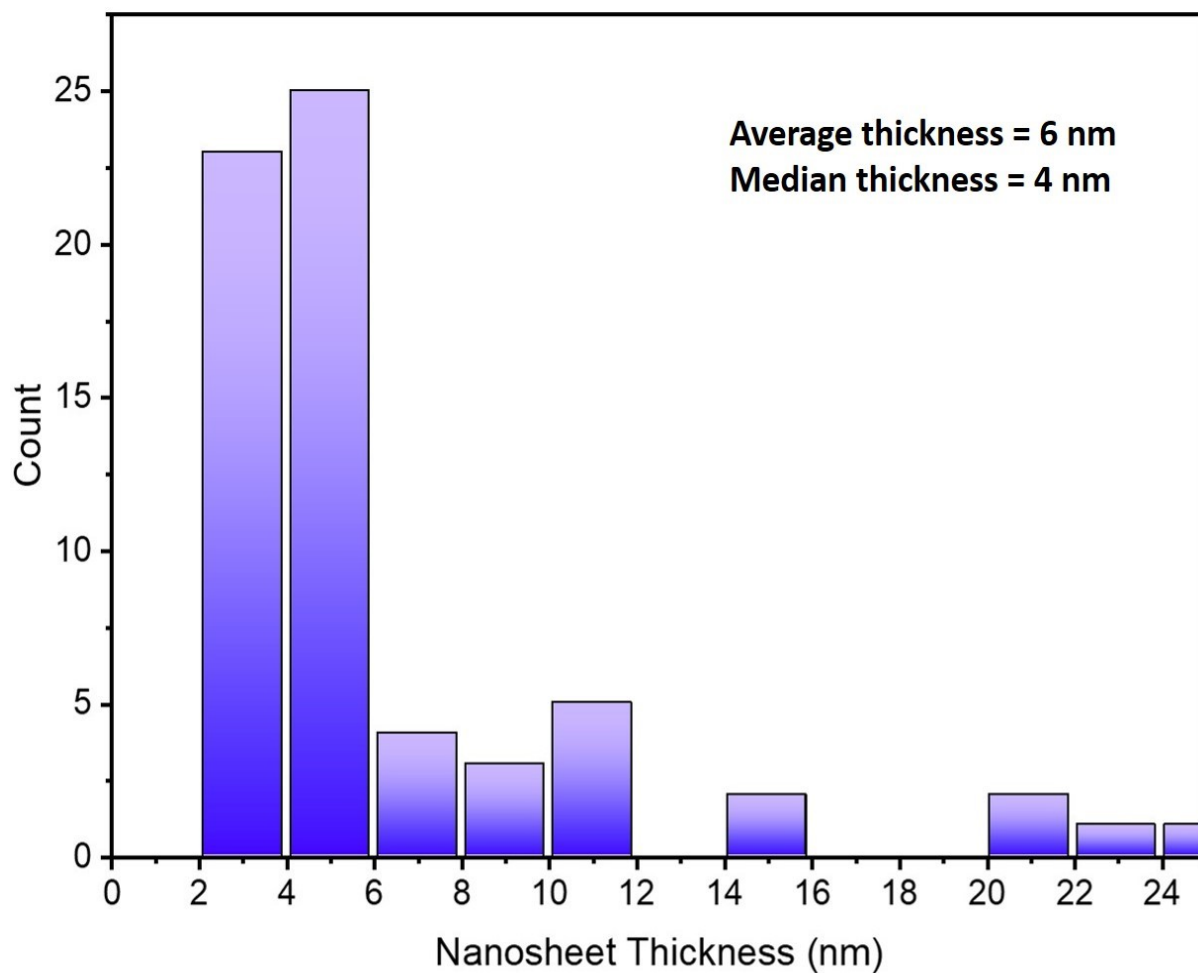

*Figure S 17: Histogram representing the thickness corresponding to the exfoliated nanosheets*

## I. UV-Vis Plots

Figure S 18: UV-Vis plot of  $\text{TiB}_2$  nanosheets dispersion at different concentration

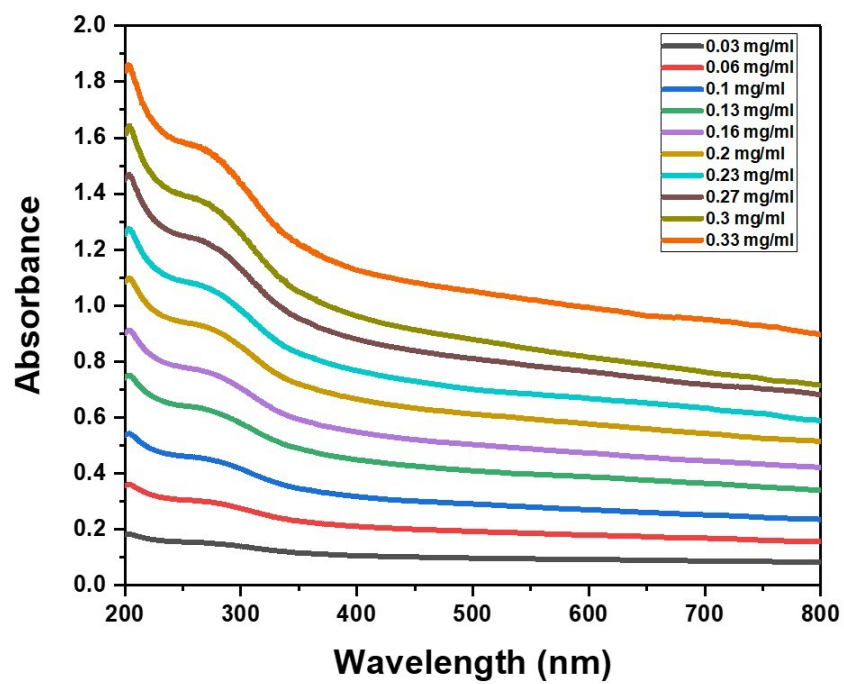

## J. Raman Spectra:

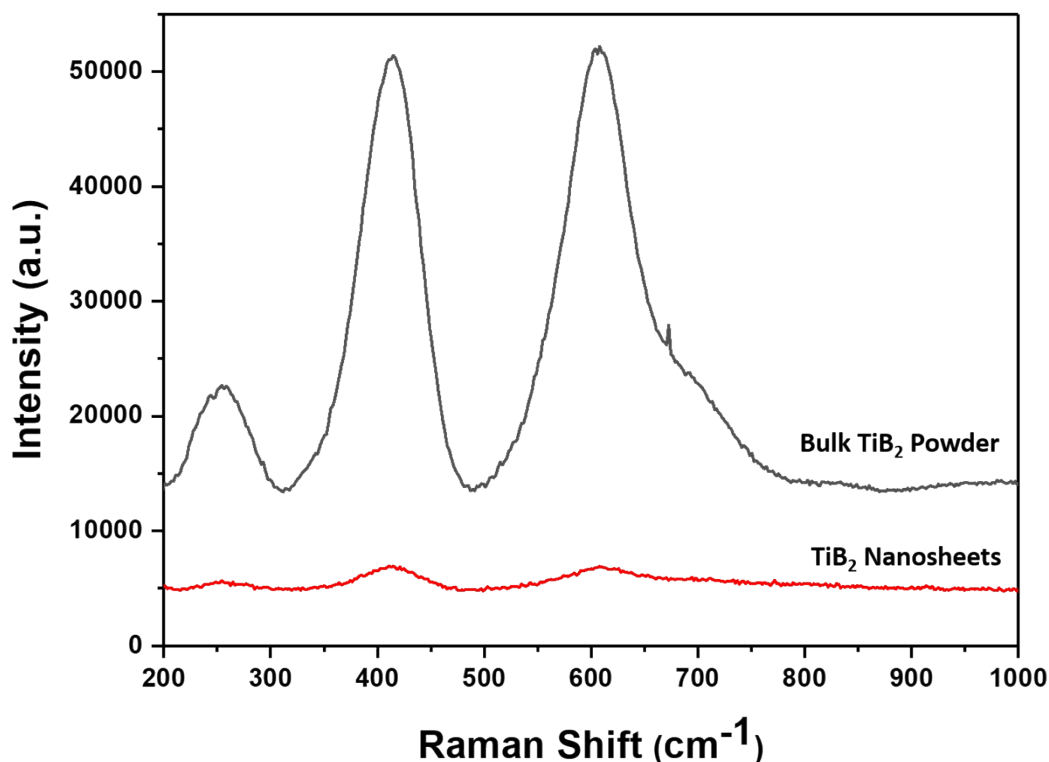

*Figure S 19: Raman spectra of bulk  $\text{TiB}_2$  and  $\text{TiB}_2$  nanosheets*

## K. XPS Results

Figure S20a depicts B1s spectra of bulk  $\text{TiB}_2$ . B1s spectrum of bulk  $\text{TiB}_2$  shows two peaks – 187.68 eV (characteristic peak attributed to Ti-B bond) and 192.68 eV (attributed to B-O bond from  $\text{B}_2\text{O}_3$ ). Ti 2p spectrum obtained from bulk  $\text{TiB}_2$  exhibits four peaks - one centered at 454.5 eV (Ti-B bond), two centered at 459.3 eV and 465.1 eV, attributed to  $2p_{3/2}$  and  $2p_{1/2}$  modes of Ti respectively, indicating presence of Ti-O bond<sup>3,4</sup> and fourth centered at 457.5 eV corresponding to Ti-N bond (Figure S20b). The mechanism of adsorption of  $\text{N}_2$  by bulk  $\text{TiB}_2$  is shown in DFT studies section where Ti atoms are solely responsible. This is corroborated by XPS results shown below. N1s spectra of bulk  $\text{TiB}_2$  exhibits four peaks – 396.5 eV, 397.6 eV, 400 eV, and 402 eV (Figure S20c). The peaks at 396.5 eV and 397.6 eV is attributed to the presence of TiN and Ti-N-O respectively. The peak at 400 eV is attributed to oxynitrides of transition metals and peak at 402 eV corresponds to adsorbed  $\text{N}_2$ . O1s spectra of bulk  $\text{TiB}_2$  also show two peaks at 530.9 eV and 532.31 eV, with the former peak being attributed to titanium dioxides and the latter being attributed to boron oxides (Figure S20d).<sup>3,5</sup> The presence of B-O bond indicates oxygen species is present even in bulk  $\text{TiB}_2$  indicative of surface functionalization.<sup>3,5,6</sup> In a study involving exfoliation of graphite, Skaltas and co-workers explained that oxygenated species are induced on the nanosheet lattice due to the defects

generated during ultrasonication.<sup>7</sup> Coleman and co-workers' explanation of the exfoliation mechanism further supported this defect generation<sup>8</sup>. We anticipate a similar phenomenon at play here. However, defects can be present even in bulk crystals and accompanied by oxygen species. This implies that while it is possible to minimize surface modification, presence of functional groups on the surface is unavoidable.

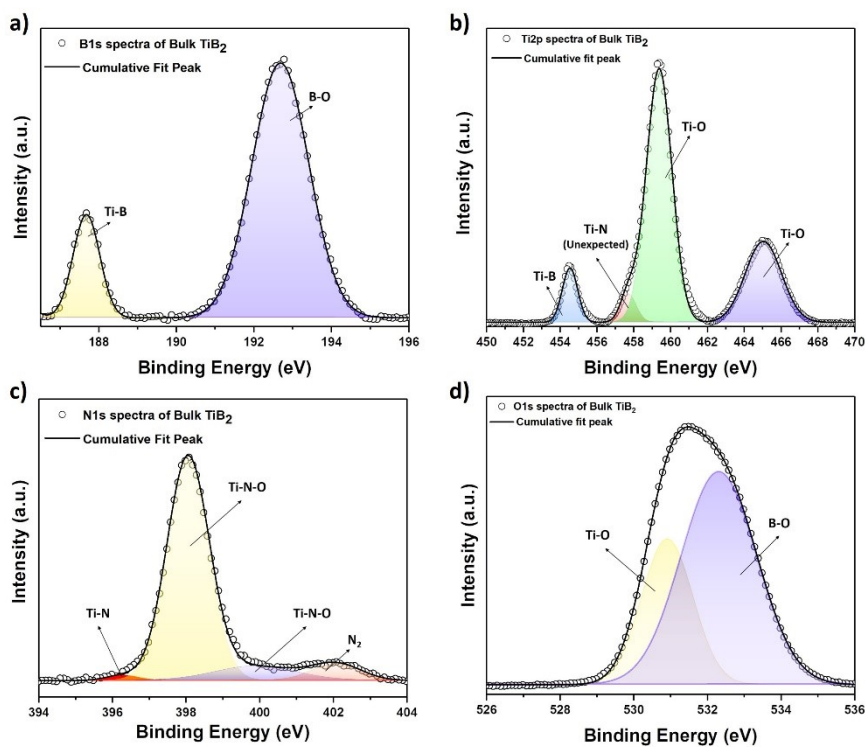

**Figure S 20:** (a)  $B1s$  spectra, (b)  $Ti2p$  spectra, (c)  $N1s$  spectra, and (d)  $O1s$  spectra of bulk  $TiB_2$  acquired by XPS

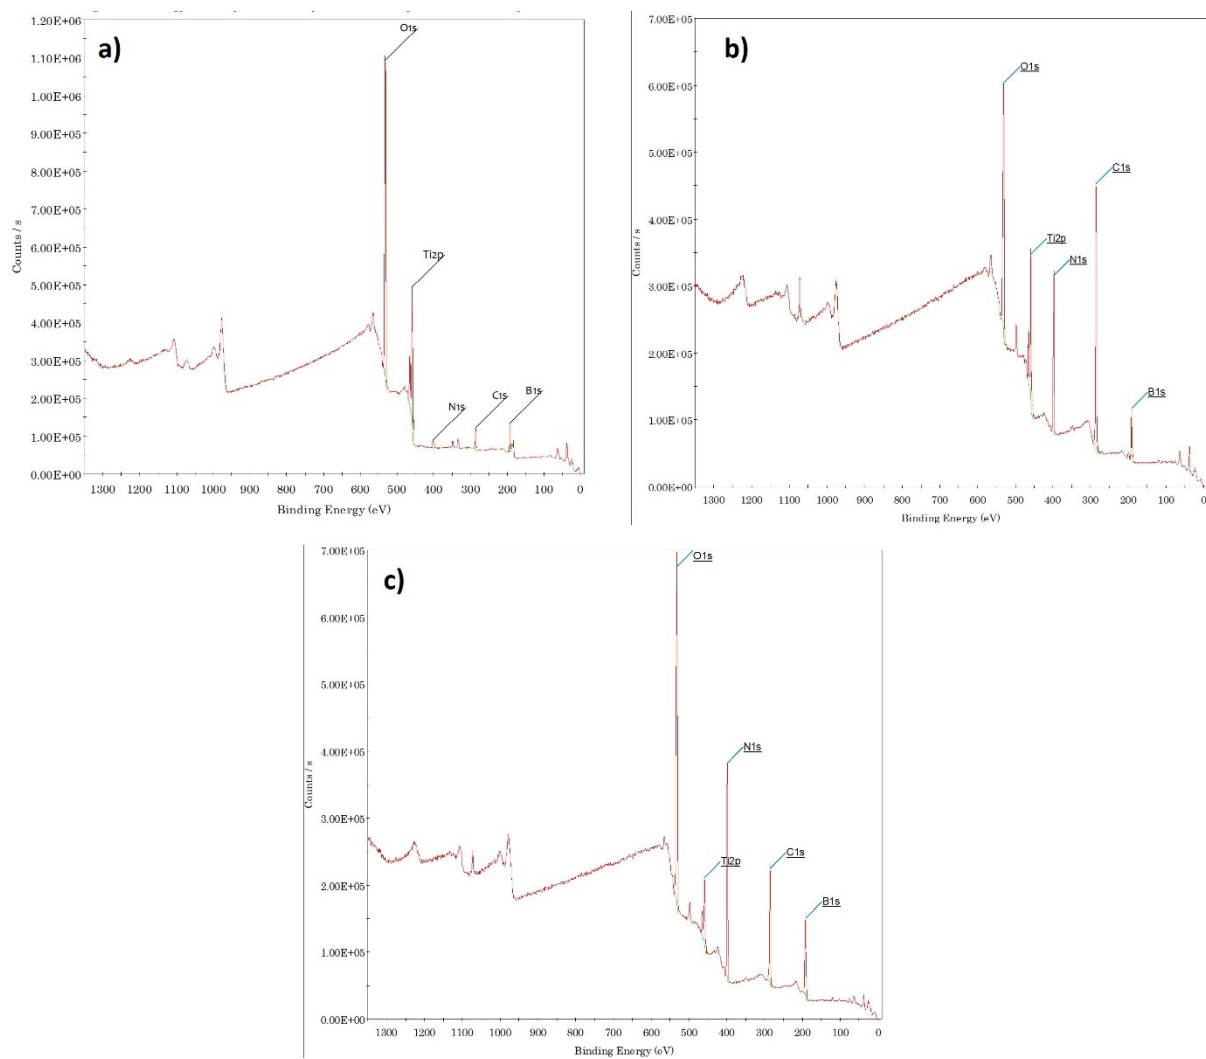

**Figure S 21:** XPS survey scan of (a) bulk TiB<sub>2</sub>, (b) TiB<sub>2</sub> nanosheets, and (c) TiB<sub>2</sub> nanosheets after TGA as obtained from the instrument



## L. ICP-AES Analysis

**Table S 3:** Stoichiometric ratio of Ti and B in the bulk TiB<sub>2</sub> and nanosheets obtained using ICP-AES analysis

| Sample                                                                                      | ICP-AES Value (mg l <sup>-1</sup> ) |        | Stoichiometric ratio |
|---------------------------------------------------------------------------------------------|-------------------------------------|--------|----------------------|
|                                                                                             | Ti                                  | B      | Ti:B                 |
| Bulk TiB <sub>2</sub>                                                                       |                                     |        |                      |
| 1                                                                                           | 36.356                              | 17.603 | 0.93:2               |
| 2                                                                                           | 35.463                              | 17.095 | 0.93:2               |
| 3                                                                                           | 43.092                              | 20.921 | 0.93:2               |
| r = 0.1; Surfactant Concentration = 1 g/l; Initial Bulk TiB <sub>2</sub> Powder = 10 g/l    |                                     |        |                      |
| 1                                                                                           | 0.231                               | 0.307  | 0.34:2               |
| 2                                                                                           | 0.263                               | 0.545  | 0.22:2               |
| 3                                                                                           | 0.251                               | 0.552  | 0.21:2               |
| r = 0.15; Surfactant Concentration = 1.5 g/l; Initial Bulk TiB <sub>2</sub> Powder = 10 g/l |                                     |        |                      |
| 1                                                                                           | 1.161                               | 1.249  | 0.42:2               |
| 2                                                                                           | 0.720                               | 0.835  | 0.39:2               |
| 3                                                                                           | 0.585                               | 0.601  | 0.44:2               |
| r = 0.2; Surfactant Concentration = 2 g/l; Initial Bulk TiB <sub>2</sub> Powder = 10 g/l    |                                     |        |                      |
| 1                                                                                           | 0.704                               | 0.451  | 0.7:2                |
| 2                                                                                           | 0.718                               | 0.562  | 0.58:2               |
| 3                                                                                           | 0.771                               | 0.607  | 0.57:2               |
| r = 0.3; Surfactant Concentration = 3 g/l; Initial Bulk TiB <sub>2</sub> Powder = 10 g/l    |                                     |        |                      |
| 1                                                                                           | 1.273                               | 0.674  | 0.85:2               |
| 2                                                                                           | 1.293                               | 0.722  | 0.81:2               |
| 3                                                                                           | 1.305                               | 0.710  | 0.83:2               |
| r = 0.4; Surfactant Concentration = 4 g/l; Initial Bulk TiB <sub>2</sub> Powder = 10 g/l    |                                     |        |                      |
| 1                                                                                           | 0.619                               | 0.491  | 0.57:2               |
| 2                                                                                           | 0.534                               | 0.395  | 0.61:2               |
| 3                                                                                           | 0.408                               | 0.298  | 0.62:2               |

From ICP-AES results, we observed that the stoichiometry of  $\text{TiB}_2$  nanosheets increased with the increasing  $C_S$  upto 3g/l. At  $C_S = 4$  g/l, we again observe a decrease in Ti atoms. This is expected since the lateral dimensions of nanosheets ( $\langle L \rangle$ ) also changes with surfactant concentration. As explained by Coleman and co-workers,  $\langle L \rangle$  shows an increase (similar to nanosheet concentration) with increasing  $C_S$  upto a certain concentration and then a decrease in  $\langle L \rangle$ . This indicates that at lower  $C_S$ ,  $\langle L \rangle$  would be less and hence, lesser presence of Ti atoms. At  $C_S = 3$ g/l, nanosheets would have high  $\langle L \rangle$  and hence more presence of Ti atoms (since  $\text{TiB}_2$  nanosheets are exfoliated, nanosheets with high  $\langle L \rangle$  have more retention of Ti atoms due to strong Ti-B bond as compared to nanosheets with less  $\langle L \rangle$ ). When the  $C_S$  increases further, depletion interactions result in settling of larger nanosheets (higher  $\langle L \rangle$ ) due to flocculation. This results in the presence of a greater number of nanosheets with less  $\langle L \rangle$  and hence, a decrease in the Ti atom concentration.

### M. EPR

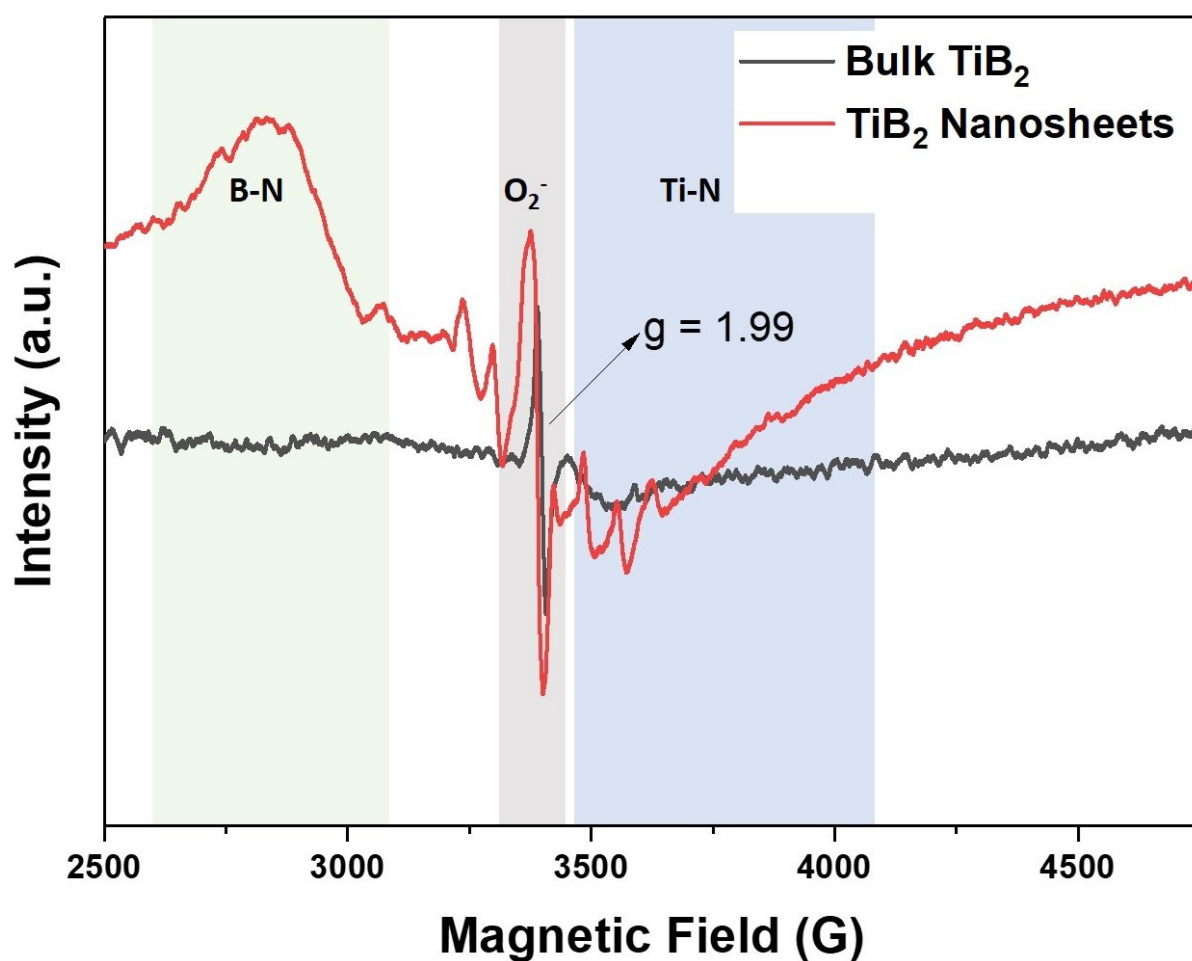

*Figure S 22: EPR spectra of bulk  $\text{TiB}_2$  and  $\text{TiB}_2$  nanosheets*

Figure S22 shows the EPR spectra of bulk  $\text{TiB}_2$  and  $\text{TiB}_2$  nanosheets. Both samples show a strong signal at  $g$  factor of  $\sim 2$  which shows the presence of adsorbed  $\text{O}_2$  molecules from the atmosphere. A higher intensity of signal at this point for  $\text{TiB}_2$  nanosheets indicates the presence of more defects compared with bulk  $\text{TiB}_2$ . The increase in the signal at values of  $g$  factor  $> 2$  shows presence of Ti-N in the system which is more intense compared with bulk  $\text{TiB}_2$ . Bodziony *et al.* inferred a similar broadening in the signal for TiN.<sup>9</sup> Similarly, the new signal observed with  $g$  factor  $< 2$  shows the presence of B-N in the system that is not present in bulk  $\text{TiB}_2$ .<sup>10</sup> These results also corroborate with TGA and XPS results.

## N. TEM-EDS Plots

TEM – EDS for different nanosheets shows the presence of boron and titanium. In some nanosheets, presence of oxygen is also detected implying that the functionalization cannot be removed completely. The presence of carbon can be due to two reasons – (i) by surfactant, or (ii) by lacey carbon grid, thus having high mass fractions. Similarly, the signal for Cu may be due to the presence of Cu support on the TEM grid. Here, the mass fraction of titanium is far less than boron as compared to boron mass fraction in the other nanosheets. Moreover, there is presence of some nitrogen. This presence has also been noted in the XPS results of the nanosheets mentioned in the main manuscript. Further studies are underway to determine the reasons behind the presence of such nitrogen signals in different characterizations.

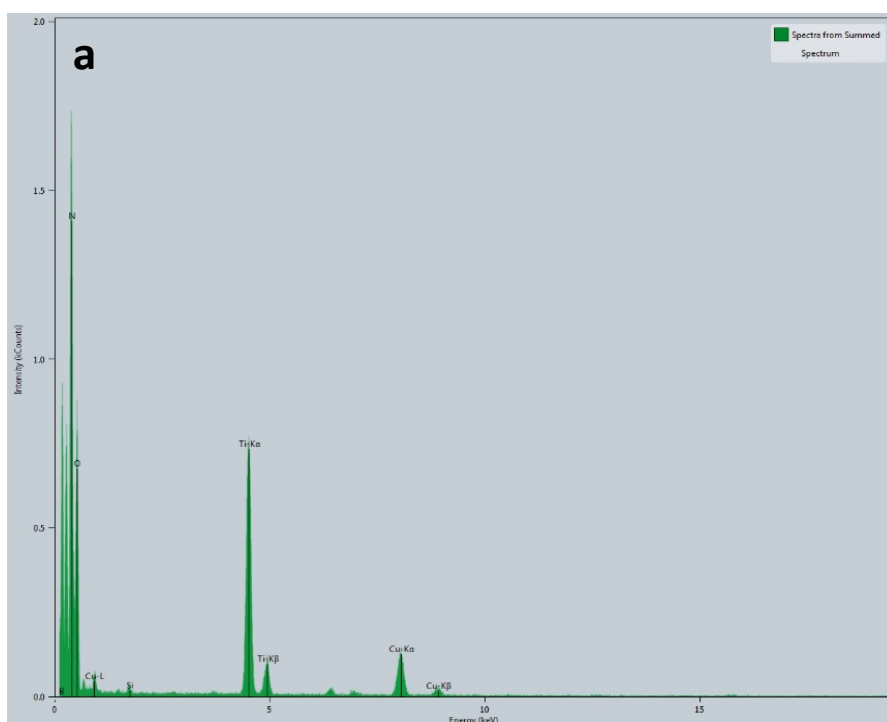

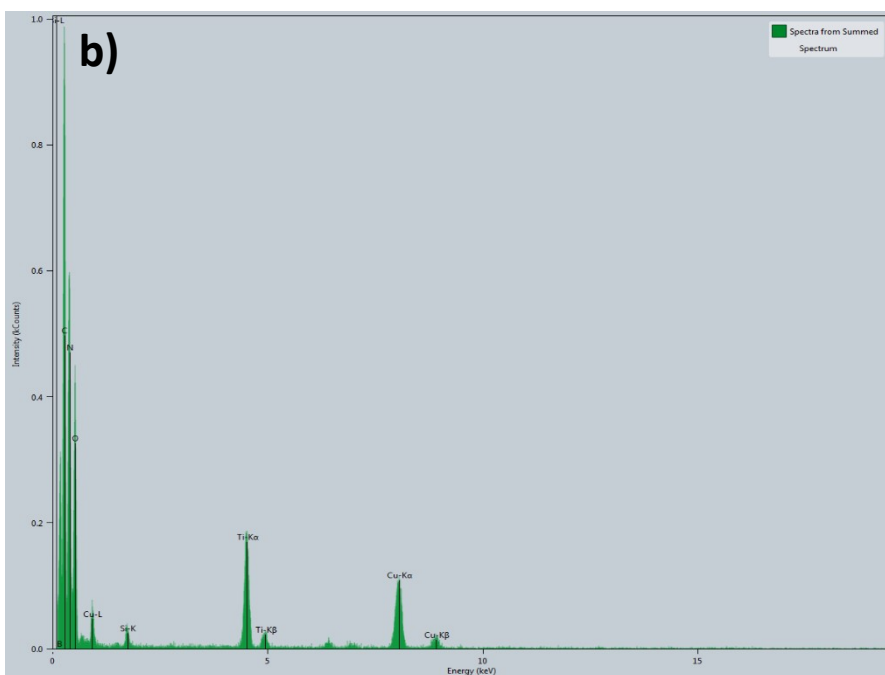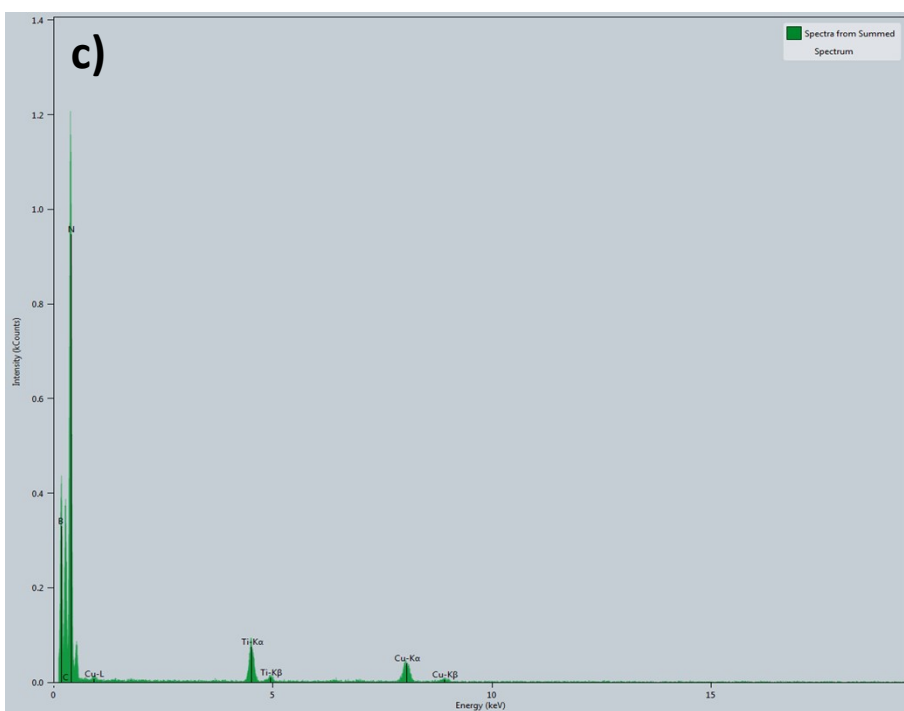

**Figure S 23:** TEM-EDS mapping of 3 different nanosheets showing presence of nitrogen

## O. TGA Analysis

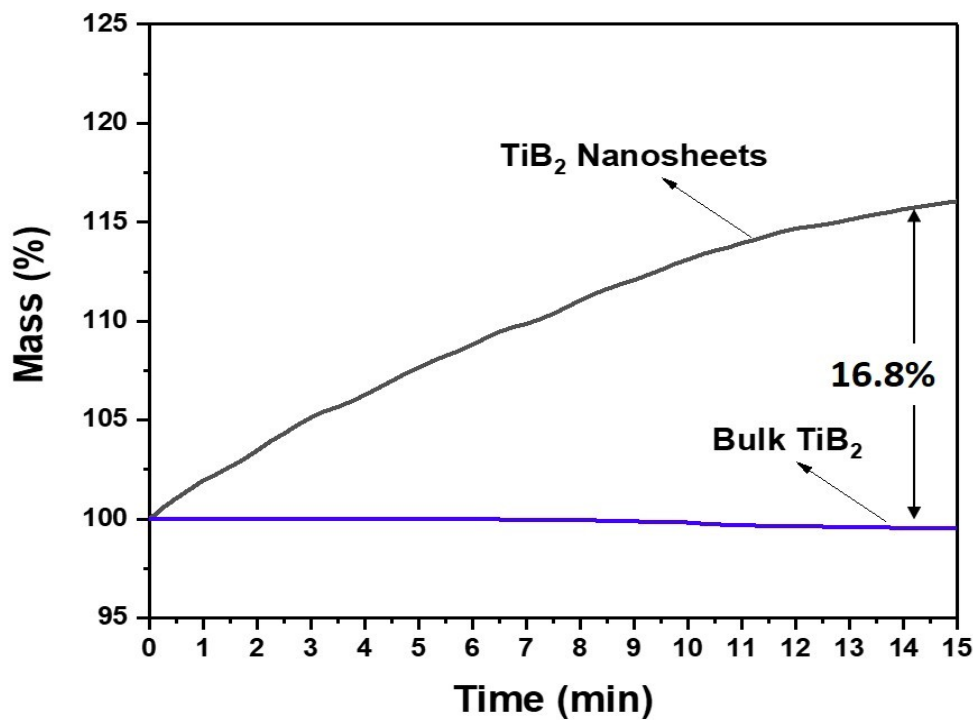

Figure S 24: Mass change (%) in bulk TiB<sub>2</sub> and TiB<sub>2</sub> nanosheets with time, when N<sub>2</sub> gas is purged at 25°C.

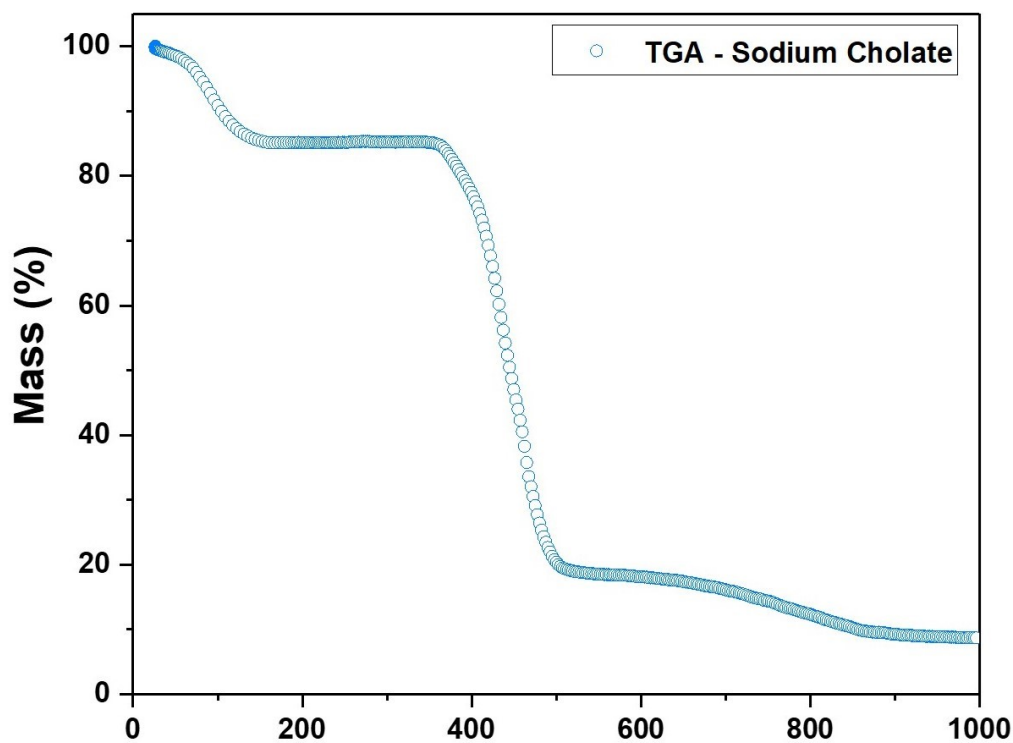

Figure S 25: Mass change (%) of sodium cholate when temperature is raised to 1000°C

## P. Characterization studies of nanosheets obtained after TGA analysis

### 1. XRD Studies

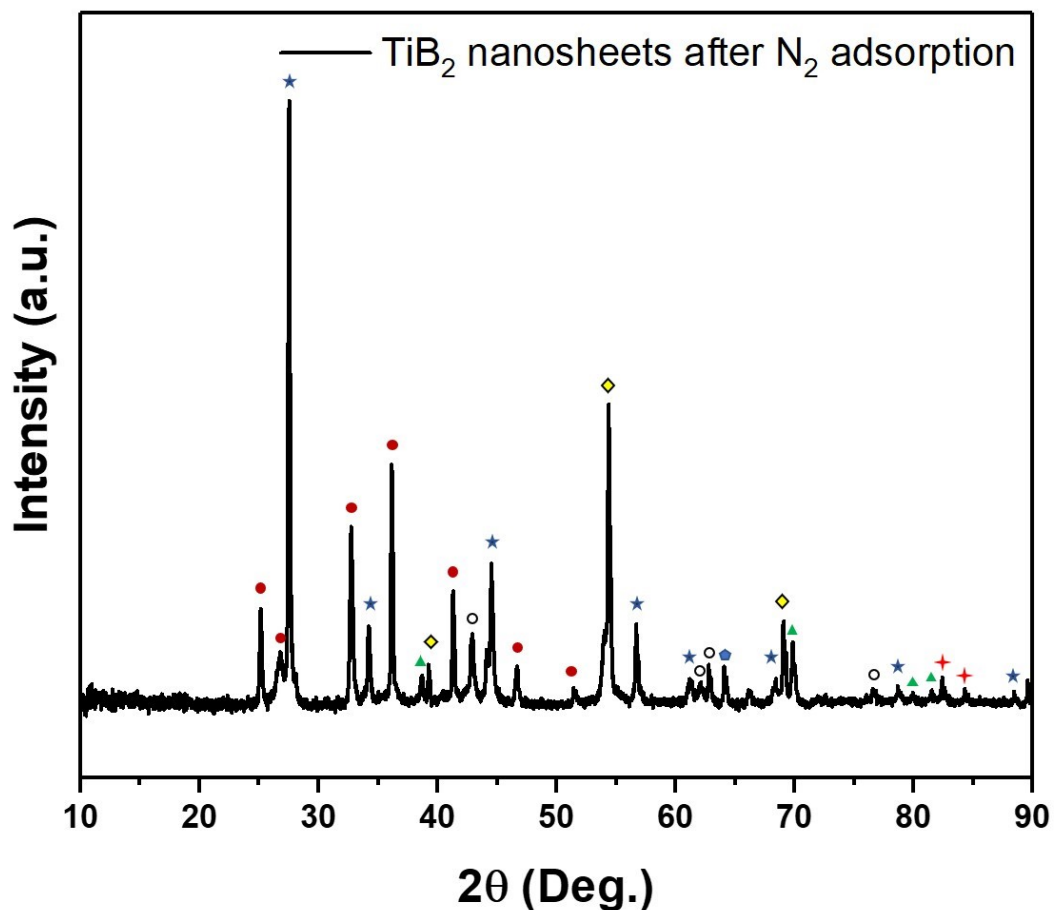

Figure S 26: XRD pattern of  $\text{TiB}_2$  nanosheets after  $\text{N}_2$  adsorption

Table S 4: Different phases formed after  $\text{N}_2$  adsorption along with  $2\theta$  values

| Symbol | Chemical Formula                                           | $2\theta$ (Deg.) | (hkl) values |
|--------|------------------------------------------------------------|------------------|--------------|
| ★      | $\text{TiB}_2$<br>(ICDD - 00-035-0741)                     | 27.5             | (001)        |
|        |                                                            | 34.2             | (100)        |
|        |                                                            | 44.4             | (101)        |
|        |                                                            | 56.9             | (002)        |
|        |                                                            | 61.2             | (110)        |
|        |                                                            | 68.3             | (111)        |
|        |                                                            | 78.6             | (201)        |
|        |                                                            | 88.3             | (112)        |
| ●      | $\text{TiO}_{0.34}\text{N}_{0.74}$<br>(ICDD - 00-044-0951) | 25.1             | (200)        |
|        |                                                            | 26.7             | (111)        |
|        |                                                            | 32.8             | (302)        |
|        |                                                            | 36.2             | (013)        |
|        |                                                            | 41.4             | (204)        |

|      |                                                                   |                                                                   |                                                                                 |       |
|------|-------------------------------------------------------------------|-------------------------------------------------------------------|---------------------------------------------------------------------------------|-------|
|      |                                                                   | 46.5                                                              | (304)                                                                           |       |
|      |                                                                   | 51.6                                                              | (022)                                                                           |       |
| ◆    | <b>BN</b><br>(ICDD - 00-018-0251)                                 | 39.2                                                              | (131)                                                                           |       |
|      |                                                                   | 54.1                                                              | (241)                                                                           |       |
|      |                                                                   | 69.2                                                              | (243)                                                                           |       |
|      |                                                                   | <b>TiN<sub>x</sub>O<sub>y</sub></b>                               |                                                                                 |       |
| ○    | <b>TiN<sub>0.37</sub>O<sub>0.51</sub></b><br>(ICDD - 04-001-8790) | 42.8                                                              | (200)                                                                           |       |
|      |                                                                   | 62.1                                                              | (220)                                                                           |       |
|      |                                                                   | <b>TiN<sub>0.24</sub>O<sub>1.88</sub></b><br>(ICDD - 04-020-5857) | 62.7                                                                            | (204) |
|      |                                                                   |                                                                   | <b>TiN<sub>0.21</sub>O<sub>0.75</sub></b><br>(ICDD - 04-006-0203)               | 76.6  |
| ◆    | <b>BNO</b><br>(ICDD - 00-037-1234)                                | 64.7                                                              |                                                                                 | (004) |
|      |                                                                   | ★                                                                 | <b>Ti<sub>0.68</sub>B<sub>0.1</sub>N<sub>0.22</sub></b><br>(ICDD - 00-014-0052) | 82.4  |
| 84.8 | (104)                                                             |                                                                   |                                                                                 |       |
| ▲    | <b>TiBO<sub>3</sub></b><br>(ICDD - 00-017-0310)                   | 38.6                                                              | (110)                                                                           |       |
|      |                                                                   | 69.8                                                              | (300)                                                                           |       |
|      |                                                                   | 76.6                                                              | (0012)                                                                          |       |
|      |                                                                   | 79.9                                                              | (0210)                                                                          |       |

We collected XRD data of TiB<sub>2</sub> nanosheets obtained after TGA studies to check if TiB<sub>2</sub> planes were retained after N<sub>2</sub> adsorption. XRD pattern shows that the native lattice structure of TiB<sub>2</sub> nanosheets was retained with major planes (001), (100), and (101) still present. We also found presence of additional phases such as BN and TiN<sub>x</sub>O<sub>y</sub>. We also identified the presence of few more phases such as TiBO<sub>3</sub> and BNO.

## 2. FTIR Spectroscopy

FTIR spectroscopy further indicated an increase in the amount of adsorbed species i.e., N<sub>2</sub> and O<sub>2</sub> (Figure S27). Two characteristic peaks of BN were observed at 810 cm<sup>-1</sup> and 1380 cm<sup>-1</sup> corresponding to out-of-plane vibration of B-N-B bond and in-plane stretching of B-N bond respectively.<sup>11</sup> Similarly, the peak at 654 cm<sup>-1</sup> corresponds to presence of TiN species that have undergone oxidation.<sup>12,13</sup> Although new peaks emerged in FTIR spectra of TiB<sub>2</sub> nanosheets and further when N<sub>2</sub> adsorption occurred when heated to 1000 °C, the peak at 1641 cm<sup>-1</sup> diminished.<sup>3,14,15</sup> This peak corresponds to the presence of Ti-OH bond, which diminishes due to nanosheets being subjected to high temperatures. These results corroborated with the phases we obtained from XRD patterns.

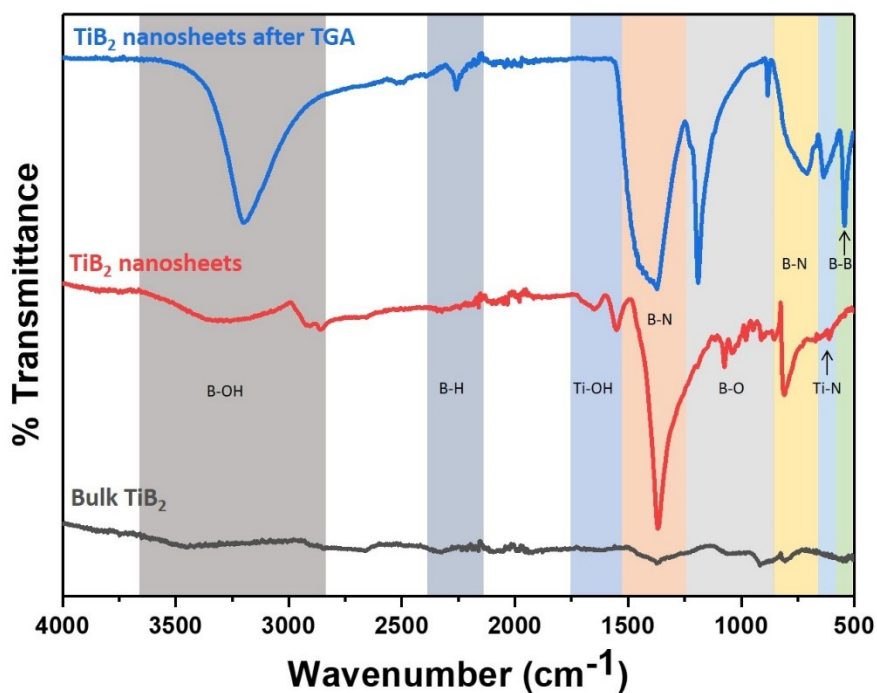

**Figure S 27:** FTIR spectra of Bulk  $TiB_2$ ,  $TiB_2$  nanosheets, and  $TiB_2$  nanosheets after  $N_2$  adsorption as obtained after TGA

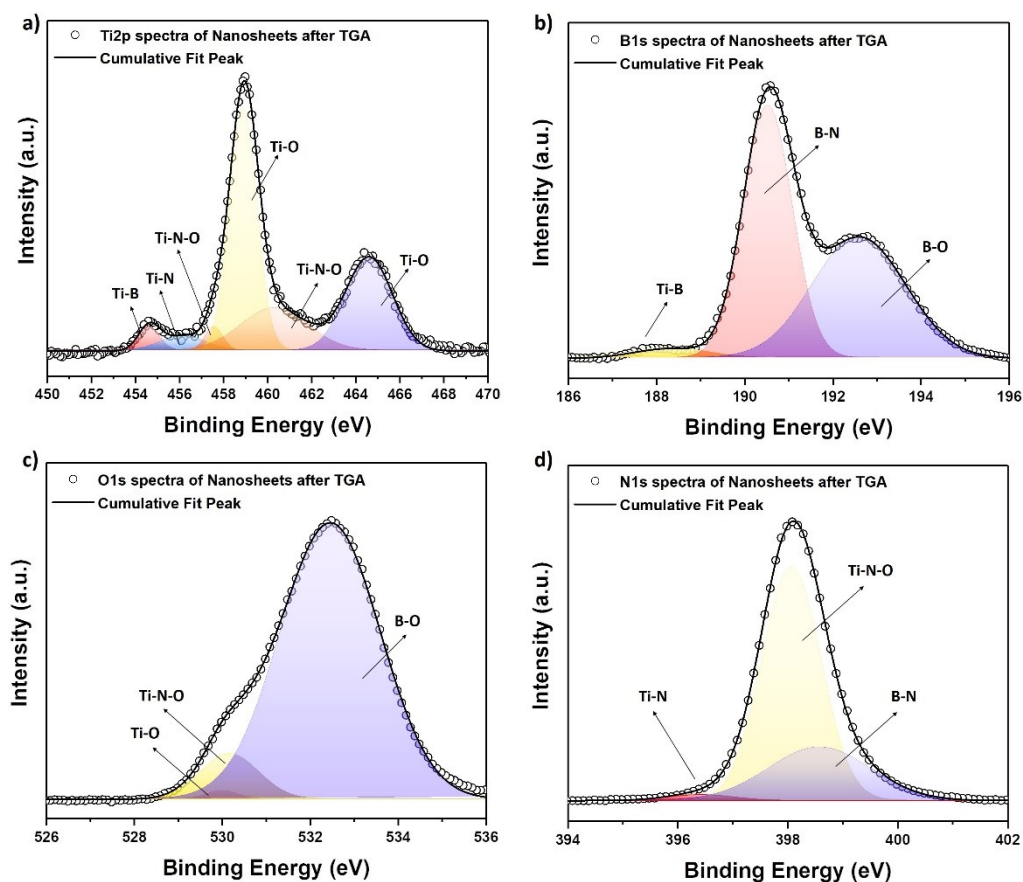

**Figure S 28:** (a)  $Ti2p$  spectra, (b)  $B1s$  spectra, (c)  $O1s$  spectra, and (d)  $N1s$  spectra of  $N_2$  adsorbed nanosheets acquired by XPS



To further understand the chemical interface of these TiB<sub>2</sub> nanosheets obtained after TGA, we collected XPS spectra (Figure S28). Ti2p spectra of these nanosheets exhibits six peaks – 454.5 eV (attributed to Ti-B bond), 455.8 eV (attributed to Ti-N bond), 457.4 eV and 460.3 eV (attributed to Ti-N-O bond), 458.8 eV and 464.5 eV (attributed to Ti-O bond).<sup>3,16–19</sup> The presence of these peaks indicates formation of metal nitride phases as observed in XRD pattern (Figure S26).

B1s spectra of N<sub>2</sub> adsorbed nanosheets exhibits similar three peaks at 187.5 eV (attributed to Ti-B bond), 190.1 eV (attributed to B-N bond), and 192.5 eV (attributed to B-O bond).<sup>3,19,20</sup> There was a decrease in the intensity of Ti-B bond and an increase in B-N bond. This is possibly due to increase in the adsorption after temperature increase. The presence of these new peaks confirms the increase in the adsorption of N<sub>2</sub>, as observed in TGA studies.

O1s spectra exhibits three peaks at 529.7 eV, 530.2 eV, and 532.5 eV. The peaks at 529.7 eV and 532.5 eV corresponds to Ti-O bond and B-O bond respectively.<sup>3,19</sup> The peak at 530.2 eV is attributed to Ti-N-O bond.<sup>19,21</sup> The decrease in the peak at 529.7 eV and corresponding increase in 530.2 eV peak indicates increase N<sub>2</sub> adsorption at Ti sites and hence, the occurrence of new TiN<sub>x</sub>O<sub>y</sub> phases in XRD.

N1s spectra of N<sub>2</sub> adsorbed nanosheets also exhibits similar peaks to TiB<sub>2</sub> nanosheets before being subjected to high temperatures i.e., 396.5 eV (attributed to Ti-N bonds), 397.7 eV (attributed to Ti-N-O bonds), and 398.3 eV (attributed to B-N bonds).<sup>16–21</sup> The B-N peak shows higher intensity when compared to TiB<sub>2</sub> nanosheets indicating that both B and Ti sites are prone to N<sub>2</sub> adsorption. The XPS survey spectrum (Figure S21) also shows increase in N<sub>2</sub> percentage from 3 % (in bulk TiB<sub>2</sub>) and 8 % (in TiB<sub>2</sub> nanosheets) to 16 % (in N<sub>2</sub> adsorbed nanosheets). These results corroborate with the findings of DFT studies that highlights the mechanism of the adsorption.

## Q. DFT Studies

### Optimized unit cell and supercell of $\text{TiB}_2$

The optimized unit cell and a  $3 \times 3 \times 3$  supercell of  $\text{TiB}_2$  are shown in Figure S23 below. For subsequent calculations of adsorption energies, either the Ti (0 0 1) or the B (0 0 1) surface was exposed, in either the pristine form, or with defects.

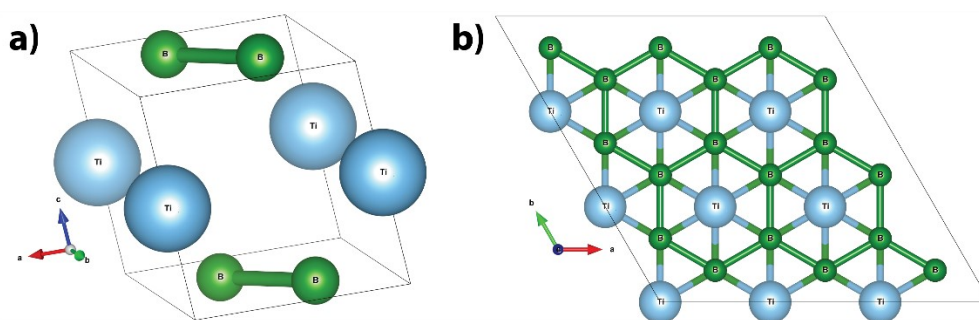

**Figure S 29:** (a) optimized unit cell of  $\text{TiB}_2$ . (b) the top view of a  $3 \times 3 \times 3$  supercell. The supercell has 81 atoms in total (27 atoms of Ti and 54 atoms of B).

### Simulation of defected surfaces for $\text{N}_2$ adsorption

Figure S24 shows the various types of defects created in the  $\text{TiB}_2$  system, for the case where Ti (0 0 1) is the exposed surface for adsorption of  $\text{N}_2$ . These include monovacant systems containing single vacancies of Ti and B (denoted as T1, T2 for titanium monovacancies; B1, B2, B3 and B4 for boron monovacancies, and a divacant system containing 2 B vacancies (denoted as B1B1). Structures were fully relaxed before calculation of adsorption energies.

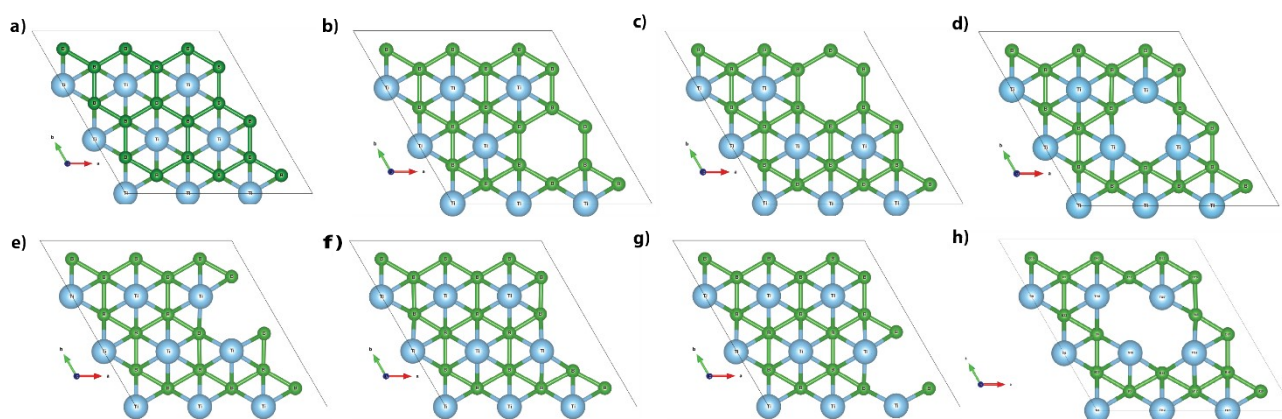

**Figure S 30:** Top view of various defected  $\text{TiB}_2$  surfaces (here, Ti-(0 0 1) is the exposed surface) used for adsorption studies. Panels represent (a) – pristine, (b) – T1 vacancy, (c) –

T2 vacancy, (d) – B1 vacancy, (e) – B2 vacancy, (f) – B3 vacancy, (g) – B4 vacancy, (h) – B1B1 (divacancy).

### Ground state energies for N<sub>2</sub> adsorption for various surfaces

**Table S 5:** Ground state energies of various systems with Ti (0 0 1) exposed surface for N<sub>2</sub> adsorption. The last column indicates the adsorption energy for N<sub>2</sub>.

| No                        | System (Ti (0 0 1) exposed)            | Without-N <sub>2</sub> | N <sub>2</sub> -adsorbed | $\Delta E$ -N <sub>2</sub> | $\Delta E_{\text{avg}}$ -N <sub>2</sub> |
|---------------------------|----------------------------------------|------------------------|--------------------------|----------------------------|-----------------------------------------|
| 1                         | TiB <sub>2</sub>                       | -643.3280              | -663.3744                | -3.42E+00                  | -1.265E-01                              |
| <b>Monovacant Systems</b> |                                        |                        |                          |                            |                                         |
| 2                         | Ti <sub>0.963</sub> B <sub>2</sub> -T1 | -632.5299              | -652.0738                | -2.91E+00                  | -1.121E-01                              |
| 3                         | Ti <sub>0.963</sub> B <sub>2</sub> -T2 | -632.5299              | -651.9744                | -2.81E+00                  | -1.082E-01                              |
| 4                         | TiB <sub>1.963</sub> -B1               | -633.0985              | -653.6220                | -3.89E+00                  | -1.497E-01                              |
| 5                         | TiB <sub>1.963</sub> -B2               | -633.0985              | -653.1233                | -3.39E+00                  | -1.306E-01                              |
| 6                         | TiB <sub>1.963</sub> -B3               | -633.0985              | -653.1180                | -3.39E+00                  | -1.303E-01                              |
| 7                         | TiB <sub>1.963</sub> -B4               | -633.0985              | -653.0179                | -3.29E+00                  | -1.265E-01                              |
| <b>Divacant System</b>    |                                        |                        |                          |                            |                                         |
| 8                         | TiB <sub>1.926</sub> -B1B1             | -626.6684              | -644.9109                | -4.592E+00                 | <b>-1.837E-01</b>                       |

**Table S 6:** Ground state energies of various systems with B (0 0 1) exposed surface for N<sub>2</sub> adsorption. The last column indicates the adsorption energy for N<sub>2</sub>.

| No                        | System (B (0 0 1) exposed)             | Without-N <sub>2</sub> | N <sub>2</sub> -adsorbed | $\Delta E$ -N <sub>2</sub> | $\Delta E_{\text{avg}}$ -N <sub>2</sub> |
|---------------------------|----------------------------------------|------------------------|--------------------------|----------------------------|-----------------------------------------|
| 1                         | TiB <sub>2</sub>                       | -643.6658              | -660.4043                | -1.08E-01                  | -3.999E-03                              |
| <b>Monovacant Systems</b> |                                        |                        |                          |                            |                                         |
| 2                         | Ti <sub>0.963</sub> B <sub>2</sub> -T1 | -629.9189              | -646.5565                | -7.022E-03                 | -2.701E-04                              |
| 3                         | Ti <sub>0.963</sub> B <sub>2</sub> -T2 | -629.9189              | -646.3393                | 2.102E-01                  | 8.084E-03                               |
| 4                         | TiB <sub>1.963</sub> -B1               | -634.4992              | -652.0068                | -8.771E-01                 | -3.373E-02                              |
| 5                         | TiB <sub>1.963</sub> -B2               | -634.4992              | -650.9196                | 2.101E-01                  | 8.081E-03                               |
| 6                         | TiB <sub>1.963</sub> -B3               | -634.4992              | -651.0560                | 7.365E-02                  | 2.833E-03                               |
| 7                         | TiB <sub>1.963</sub> -B4               | -634.4992              | -650.9144                | 2.153E-01                  | 8.280E-03                               |
| <b>Divacant System</b>    |                                        |                        |                          |                            |                                         |
| 8                         | TiB <sub>1.926</sub> -B1B1             | -626.6684              | -649.0224                | -5.723E+00                 | <b>-2.289E-01</b>                       |

### Bader charge analysis

**Table S 7:** Bader charge for various atom Ids corresponding to Ti and B from Figure 5e.

| Atom Id for pristine and N <sub>2</sub> -adsorbed TiB <sub>2</sub> surface atoms | Atomic charge    |                                 |
|----------------------------------------------------------------------------------|------------------|---------------------------------|
|                                                                                  | TiB <sub>2</sub> | TiB <sub>2</sub> N <sub>2</sub> |
| <b>Ti15</b>                                                                      | 8.9960           | 8.6162                          |
| <b>Ti18</b>                                                                      | 8.9959           | 8.7329                          |
| <b>Ti24</b>                                                                      | 8.9959           | 8.7329                          |

|             |        |        |
|-------------|--------|--------|
| <b>Ti27</b> | 8.9960 | 8.6162 |
| <b>B33</b>  | 3.8890 | 3.8382 |
| <b>B42</b>  | 3.7962 | 3.7204 |
| <b>B45</b>  | 3.8890 | 3.8382 |
| <b>B66</b>  | 3.8890 | 3.8382 |
| <b>B69</b>  | 3.8876 | 3.8119 |
| <b>B78</b>  | 3.8890 | 3.8382 |
| <b>N82</b>  | -      | 5.9890 |
| <b>N83</b>  | -      | 5.8509 |

## Adsorption energies of N<sub>2</sub>

**Table S 8:** Average N<sub>2</sub> adsorption energies for 4 surfaces (2 pristine and 2 with Boron divacant defects), as shown in Figure 6 in the manuscript.

| <i>Species adsorbed</i>     | *      | N <sub>2</sub> |
|-----------------------------|--------|----------------|
| Ti-(0 0 1) top layer        | 0.0000 | -3.4158        |
| Ti-(0 0 1) top layer - B1B1 | 0.0000 | -4.5919        |
| B-(0 0 1) top layer         | 0.0000 | -0.1080        |
| B-(0 0 1) top layer - B1B1  | 0.0000 | -5.7235        |

## References:

- 1 J. Wang, Y. Xia, Y. Dong, R. Chen, L. Xiang and S. Komarneni, *Appl Catal B*, 2016, **192**, 8–16.
- 2 X. H. Zhang, N. Li, J. Wu, Y. Z. Zheng and X. Tao, *Appl Catal B*, 2018, **229**, 227–236.
- 3 A. L. James, M. Lenka, N. Pandey, A. Ojha, A. Kumar, R. Saraswat, P. Thareja, V. Krishnan and K. Jasuja, *Nanoscale*, 2020, **12**, 17121–17131.
- 4 G. Greczynski and L. Hultman, *Appl Surf Sci*, 2021, **542**, 148599.
- 5 A. L. James and K. Jasuja, *RSC Adv*, 2017, **7**, 1905–1914.
- 6 X. Guo, G. Zhang, H. Cui, N. Wei, X. Song, J. Li and J. Tian, *Appl Catal B*, 2017, **217**, 12–20.
- 7 T. Skaltsas, X. Ke, C. Bittencourt and N. Tagmatarchis, *J Phys Chem C*, 2013, **117**, 23272–23278.

- 8 Z. Li, R. J. Young, C. Backes, W. Zhao, X. Zhang, A. A. Zhukov, E. Tillotson, A. P. Conlan, F. Ding, S. J. Haigh, K. S. Novoselov and J. N. Coleman, *ACS Nano*, 2020, **14**, 10976–10985.
- 9 T. Bodziony, N. Guskos, A. Biedunkiewicz, J. Typek, R. Wróbel and M. Maryniak, *Mater Sci Poland*, 2005, 899--907.
- 10 F. F. Murzakhonov, B. v. Yavkin, G. v. Mamin, S. B. Orlinskii, I. E. Mumdzhi, I. N. Gracheva, B. F. Gabbasov, A. N. Smirnov, V. Y. Davydov and V. A. Soltamov, *Nanomaterials 2021, Vol. 11, Page 1373*, 2021, **11**, 1373.
- 11 T. Shen, S. Liu, W. Yan and J. Wang, *J Mater Sci*, 2019, **54**, 8852–8859.
- 12 D. Choi and P. N. Kumta, *J Electrochem Soc*, 2006, **153**, A2298.
- 13 K. S. Schramke, Y. Qin, J. T. Held, K. A. Mkhoyan and U. R. Kortshagen, *ACS Appl Nano Mater*, 2018, **1**, 2869–2876.
- 14 G. Gohari, A. Mohammadi, A. Akbari, S. Panahirad, M. R. Dadpour, V. Fotopoulos and S. Kimura, *Scientific Reports 2020 10:1*, 2020, **10**, 1–14.
- 15 R. Patidar, H. Gunda, A. K. Varma, R. Gawas, S. K. Das and K. Jasuja, *Ceram Int*, 2020, **46**, 28324–28331.
- 16 S. Jiang, B. Yi, H. Zhang, W. Song, Y. Bai, H. Yu and Z. Shao, *ChemElectroChem*, 2016, **3**, 734–740.
- 17 Y. Han, X. Yue, Y. Jin, X. Huang and P. K. Shen, *J Mater Chem A Mater*, 2016, **4**, 3673–3677.
- 18 E. O. Filatova, S. S. Sakhonenkov, A. S. Konashuk, S. A. Kasatikov and V. V. Afanas'Ev, *J Phys Chem C*, 2019, **123**, 22335–22344.
- 19 G. M. National Institute of Standards and Technology, NIST X-ray Photoelectron Spectroscopy Database, NIST Standard Reference Database Number 20.
- 20 Q. Liu, C. Chen, M. Du, Y. Wu, C. Ren, K. Ding, M. Song and C. Huang, *ACS Appl Nano Mater*, 2018, **1**, 4566–4575.
- 21 A. Hinckley and A. Muscat, *Solid State Phenomena*, 2018, **282**, 232–237.
